1 **TITLE:**

2 **Microbial signatures in the lower airways of mechanically ventilated COVID19**  
3 **patients associated with poor clinical outcome**

4  
5 *Imran Sulaiman<sup>1,2</sup>, Matthew Chung<sup>3</sup>, Luis Angel<sup>1,2</sup>, Jun-Chieh J. Tsay<sup>1,2,4</sup>, Benjamin G.*  
6 *Wu<sup>1,2,4</sup>, Stephen T. Yeung<sup>5</sup>, Kelsey Krolkowski<sup>1,2</sup>, Yonghua Li<sup>1,2</sup>, Ralf Duerr<sup>5</sup>,*  
7 *Rosemary Schluger<sup>1,2</sup>, Sara A. Thannickal<sup>5</sup>, Akiko Koide<sup>2,6</sup>, Samaan Rafeq<sup>1,2</sup>, Clea*  
8 *Barnett<sup>1,2</sup>, Radu Postelnicu<sup>1,2</sup>, Chang Wang<sup>7</sup>, Stephanie Banakis<sup>3</sup>, Lizzette Perez-*  
9 *Perez<sup>8</sup>, George Jour<sup>9</sup>, Guomiao Shen<sup>9</sup>, Peter Meyn<sup>10</sup>, Joseph Carpenito<sup>1,2</sup>, Xiuxiu*  
10 *Liu<sup>1,10</sup>, Kun Ji<sup>1,11</sup>, Destiny Collazo<sup>1,2</sup>, Anthony Labarbiera<sup>1,2</sup>, Nancy Amoroso<sup>1,2</sup>, Shari*  
11 *Brosnahan<sup>1,2</sup>, Vikramjit Mukherjee<sup>1,2</sup>, David Kaufman<sup>1,2</sup>, Jan Bakker<sup>1,2</sup>, Anthony*  
12 *Lubinsky<sup>1,2</sup>, Deepak Pradhan<sup>1,2</sup>, Daniel H. Sterman<sup>1,2</sup>, Michael Weiden<sup>1,2</sup>, Adriana*  
13 *Hegu<sup>9,12</sup>, Laura Evans<sup>13</sup>, Timothy M. Uyeki<sup>14</sup>, Jose C. Clemente<sup>15</sup>, Emmie De wit<sup>8</sup>, Ann*  
14 *Marie Schmidt<sup>16</sup>, Bo Shopsin<sup>17</sup>, Ludovic Desvignes<sup>5</sup>, Chan Wang<sup>18</sup>, Huilin Li<sup>18</sup>, Bin*  
15 *Zhang<sup>19</sup>, Christian V. Forst<sup>19</sup>, Shohei Koide<sup>6,20</sup>, Kenneth A. Stapleford<sup>5</sup>, Kamal M.*  
16 *Khanna<sup>5,6</sup>, Elodie Ghedin<sup>3,7\*</sup>, and Leopoldo N. Segal<sup>1,2,6\*</sup>*

17  
18 <sup>1</sup>Division of Pulmonary and Critical Care Medicine, New York University Grossman  
19 School of Medicine, NYU Langone Health, New York, NY

20 <sup>2</sup> Department of Medicine, New York University Grossman School of Medicine, NYU  
21 Langone Health, New York, NY

22 <sup>3</sup>Systems Genomics Section, Laboratory of Parasitic Diseases, National Institute of  
23 Allergy and Infectious Diseases, National Institutes of Health, Bethesda, MD

24 <sup>4</sup>Division of Pulmonary and Critical Care Medicine, VA New York Harbor Healthcare  
25 System, NY

26 <sup>5</sup> Department of Microbiology, New York University Grossman School of Medicine, NYU  
27 Langone Health, New York, NY.

28 <sup>6</sup> Laura and Isaac Perlmutter Cancer Center, New York University School of Medicine,  
29 NYU Langone Health, New York, NY.

30 <sup>7</sup> Center for Genomics & Systems Biology, Department of Biology, New York University  
31 New York, NY

32 <sup>8</sup> Molecular Pathology Unit, Laboratory of Virology, National Institute of Allergy and  
33 Infectious Diseases, National Institutes of Health, Rocky Mountain Laboratories,  
34 Hamilton, MT

35 <sup>9</sup> Department of Pathology, New York University Grossman School of Medicine, NYU  
36 Langone Health, New York, NY.

37 <sup>10</sup> Division of Pediatrics, Longhua Hospital Affiliated to Shanghai University of Chinese  
38 Medicine, CN

39 <sup>11</sup> Dongfang Hospital affiliated to Beijing University of Traditional Chinese Medicine,  
40 Beijing, China

41 <sup>12</sup> NYU Langone Genome Technology Center, New York University Grossman School  
42 of Medicine, NYU Langone Health, New York, NY

43 <sup>13</sup> Pulmonary, Critical Care and Sleep Medicine, University of Washington, Seattle, USA

44 <sup>14</sup> Influenza Division, Centers for Disease Control and Prevention, Atlanta, GA

45 <sup>15</sup> Department of Genetics and Genomic Sciences and Immunology Institute, Icahn  
46 School of Medicine at Mount Sinai, NY.

47 <sup>16</sup> Diabetes Research Program, Division of Endocrinology, Diabetes and Metabolism,  
48 Department of Medicine, New York University Grossman School of Medicine, NYU  
49 Langone Health, New York, NY

50 <sup>17</sup> Division of Infectious Diseases, Department of Medicine, New York University School  
51 of Medicine, NYU Langone Health, New York, NY

52 <sup>18</sup> Department of Population Health, New York University School of Medicine, NYU  
53 Langone Health, New York, NY

54 <sup>19</sup> Department of Genetics and Genomic Sciences, Icahn Institute of Genomics and  
55 Multiscale Biology, Icahn School of Medicine at Mount Sinai, New York, NY

56 <sup>20</sup> Department of Biochemistry and Molecular Pharmacology, New York University  
57 Grossman School of Medicine, NYU Langone Health, New York, NY  
58 and Perlmutter Cancer Center, New York, NY 10016

59

60

61 Imran Sulaiman, MD, PhD [SheikMohammadImran.Sulaiman@nyumc.org](mailto:SheikMohammadImran.Sulaiman@nyumc.org)

62 Matthew Chung, PhD [matt.chung@nih.gov](mailto:matt.chung@nih.gov)

63 Luis Angel, MD [Luis.Angel@nyulangone.org](mailto:Luis.Angel@nyulangone.org)

64 Jun-Chieh J. Tsay, MD [jun-chieh.tsay@nyumc.org](mailto:jun-chieh.tsay@nyumc.org)

65 Benjamin G. Wu, MD [Benjamin.Wu@nyumc.org](mailto:Benjamin.Wu@nyumc.org)

66 Stephen Yeung, PhD [Stephen.Yeung@nyulangone.org](mailto:Stephen.Yeung@nyulangone.org)

67 Kelsey Krolikowski [Kelsey.Krolikowski@nyulangone.org](mailto:Kelsey.Krolikowski@nyulangone.org)

68 Yonghua Li, MD, PhD [Yonghua.Li@nyumc.org](mailto:Yonghua.Li@nyumc.org)

69 Ralf Duerr, MD, PhD [Ralf.Duerr@nyulangone.org](mailto:Ralf.Duerr@nyulangone.org)

70 Rosemary Schluger, RN [rosemary.schluger@nyumc.org](mailto:rosemary.schluger@nyumc.org)

71 Sara A. Thannickal, BS [Sara.thannickal@nyulangone.org](mailto:Sara.thannickal@nyulangone.org)

72 Akiko Koide, PhD, [Akiko.Koide@nyulangone.org](mailto:Akiko.Koide@nyulangone.org)

73 Samaan Rafeq, MD [Samaan.Rafeq@nyulangone.org](mailto:Samaan.Rafeq@nyulangone.org)

74 Clea Barnett, MD [Clea.Barnett@nyulangone.org](mailto:Clea.Barnett@nyulangone.org)

75 Radu Postelnicu, MD [Radu.Postelnicu@nyulangone.org](mailto:Radu.Postelnicu@nyulangone.org)

76 Chang Wang, PhD [cw2505@nyu.edu](mailto:cw2505@nyu.edu)

77 Stephanie Banakis [stephanie.banakis@nih.gov](mailto:stephanie.banakis@nih.gov)

78 Lizzette Perez-Perez [lizzette.perez-perez@nih.gov](mailto:lizzette.perez-perez@nih.gov)

79 George Jour, PhD [George.Jour@nyulangone.org](mailto:George.Jour@nyulangone.org)

80 Guomiao Shen, PhD [Guomiao.Shen@nyulangone.org](mailto:Guomiao.Shen@nyulangone.org)

81 Peter Meyn [peter.meyn@nyumc.org](mailto:peter.meyn@nyumc.org)

82 Joseph Carpenito [Joseph.carpenito@nyumc.org](mailto:Joseph.carpenito@nyumc.org)

83 Xiuxiu Liu, MS [liuxiuxiu\\_longhua@outlook.com](mailto:liuxiuxiu_longhua@outlook.com)

84 Kun Ji, MD, PhD [Kun.Ji@nyulangone.org](mailto:Kun.Ji@nyulangone.org)

85 Destiny Collazo [Destiny.Collazo@nyulangone.org](mailto:Destiny.Collazo@nyulangone.org)

86 Anthony Labarbiera [Anthony.Labarbiera@nyulangone.org](mailto:Anthony.Labarbiera@nyulangone.org)

87 Nancy Amoroso, MD [Nancy.Amoroso@nyulangone.org](mailto:Nancy.Amoroso@nyulangone.org)

88 Shari Brosnahan, MD [Shari.Brosnahan@nyulangone.org](mailto:Shari.Brosnahan@nyulangone.org)

89 Vikramjit Mukherjee, MD [Vikramjit.Mukherjee@nyulangone.org](mailto:Vikramjit.Mukherjee@nyulangone.org)

90 David Kaufman, MD [David.A.Kaufman@nyulangone.org](mailto:David.A.Kaufman@nyulangone.org)

91 Jan Bakker, MD, PhD [Jan.Bakker@nyulangone.org](mailto:Jan.Bakker@nyulangone.org)

92 Anthony Lubinsky, MD [Anthony.Lubinsky@nyulangone.org](mailto:Anthony.Lubinsky@nyulangone.org)

93 Deepak Pradhan, MD [Deepak.Pradhan@nyulangone.org](mailto:Deepak.Pradhan@nyulangone.org)

94 Daniel H. Serman, MD [Daniel.sterman@nyumc.org](mailto:Daniel.sterman@nyumc.org)

|     |                            |                                   |
|-----|----------------------------|-----------------------------------|
| 95  | Michael Weiden, MD         | Michael.Weiden@nyulangone.org     |
| 96  | Adriana Heguy, PhD         | Adriana.heguy@nyumc.org           |
| 97  | Laura Evans, MD            | leevans@uw.edu                    |
| 98  | Timothy M. Uyeki, MD, MPH  | tmu0@cdc.gov                      |
| 99  | Jose C. Clemente, PhD      | jose.clemente@mssm.edu            |
| 100 | Emmie De wit               | emmie.dewit@nih.gov               |
| 101 | Ann Marie Schmidt, MD      | AnnMarie.Schmidt@nyulangone.org   |
| 102 | Bo Shopsin, MD, PhD        | Bo.Shopsin@nyulangone.org         |
| 103 | Ludovic Desvignes, PhD     | Ludovic.Desvignes@nyulangone.org  |
| 104 | Chan Wang, PhD             | Chan.Wang@nyulangone.org          |
| 105 | Huilin Li, PhD             | Huilin.Li@nyulangone.org          |
| 106 | Bin Zhang, PhD             | bin.zhang@mssm.edu                |
| 107 | Christian V. Forst, PhD    | christian.forst@mssm.edu          |
| 108 | Shohei Koide, PhD          | Shohei.Koide@nyulangone.org       |
| 109 | Kenneth A. Stapleford, PhD | Kenneth.Stapleford@nyulangone.org |
| 110 | Kamal Khanna, PhD          | Kamal.Khanna@nyulangone.org       |
| 111 | Elodie Ghedin, PhD         | elodie.ghedin@nih.gov             |
| 112 | Leopoldo N. Segal, MD      | Leopoldo.Segal@nyumc.org          |

113  
114 \*Corresponding Authors: Elodie Ghedin (elodie.ghedin@nih.gov) and Leopoldo N.  
115 Segal, (Leopoldo.Segal@nyumc.org)

116  
117

#### 118 **Authors Contributions:**

119 Study conception and design: IS, LA, LD, SK, KS, KK, EG, LNS  
120 Data was obtained by: IS, LA, SY, KK, YL, RD, RS, SAT, AK, SR, CB, RP, GJ, GS, PM,  
121 JC, XL, KJ, DC, AL, NA, SB, VM, DK, JB, AL, DP, LPP, EDW, DHS, AH, LNS  
122 Data were analyzed by: IS, MC, JCJT, BGW, SY, KK, RD, CW, JCC, CW, HL, CVF, BZ,  
123 SK, KS, EG, LNS  
124 The first draft of the manuscript was written by: IS, MC, LA, EG, LNS  
125 All authors read, critically revised and approved the final manuscript.

126

#### 127 **Research support funding:**

128 R37 CA244775 (LNS, NCI/NIH); R01 HL125816 (LNS, SBK, NHLBI/NIH); Colton Pilot  
129 Project Grant (LNS, LA, SBL, KK); UWSC12030 (LNS, RP, LE, CDC Foundation);  
130 PACT grant (LNS, FNIH); R21 AI158997 (SK); R01 AI143861 (KMK, NIAID/NIH); R01  
131 AI143861-02S1 (KMK, NIAID/NIH); R01 DK110014 (HL and CW, NIDDK/NIH); P20  
132 CA252728 (CW and HL, NCI/NIH) American Association for Cancer Research Grant  
133 (HP/LNS); The Genome Technology Center is partially supported by the Cancer Center  
134 Support Grant P30CA016087 at the Laura and Isaac Perlmutter Cancer Center (AH,  
135 AT); FAMRI Young Clinical Scientist Award (BGW), Stony Wold-Herbert Fund Grant-in-  
136 Aid/Fellowship (IS, CB). This work was supported in part by the Division of Intramural  
137 Research (DIR) of the NIAID/NIH (EG, EDW).

138

#### 139 **Acknowledgement:**

140 We would like to thank the Genome Technology Center (GTC) for expert library  
141 preparation and sequencing, and the Applied Bioinformatics Laboratories (ABL) for  
142 providing bioinformatics support and helping with the analysis and interpretation of the

143 data. Experimental Pathology Research Laboratory for histopathology services and  
144 imaging. GTC and ABL are shared resources partially supported by the Cancer Center  
145 Support Grant P30CA016087 at the Laura and Isaac Perlmutter Cancer Center. This  
146 work has used computing resources at the NYU School of Medicine High Performance  
147 Computing Facility (HPCF). Financial support for the PACT project is possible through  
148 funding support provided to the FNIH by: AbbVie Inc., Amgen Inc., Boehringer-  
149 Ingelheim Pharma GmbH & Co. KG, Bristol-Myers Squibb, Celgene Corporation,  
150 Genentech Inc., Gilead, GlaxoSmithKline plc, Janssen Pharmaceutical Companies of  
151 Johnson & Johnson, Novartis Institutes for Biomedical Research, Pfizer Inc., and  
152 Sanofi. The findings and conclusions in this report are those of the authors and do not  
153 necessarily represent the official position of the Centers for Disease Control and  
154 Prevention.

155

156

157

158 Running Head: COVID-19

159

160

161 Word Count: 4869

162 Body of the manuscript:

163

164

165 Financial Disclosure: None

166

167

168 Key words: microbiome, virome, severe acute respiratory syndrome

169

170

171

172

173

174

175 **Abstract:**

176 Mortality among patients with COVID-19 and respiratory failure is high and there are no known  
177 lower airway biomarkers that predict clinical outcome. We investigated whether bacterial  
178 respiratory infections and viral load were associated with poor clinical outcome and host  
179 immune tone. We obtained bacterial and fungal culture data from 589 critically ill subjects with  
180 COVID-19 requiring mechanical ventilation. On a subset of the subjects that underwent  
181 bronchoscopy, we also quantified SARS-CoV-2 viral load, analyzed the microbiome of the lower  
182 airways by metagenome and metatranscriptome analyses and profiled the host immune  
183 response. We found that isolation of a hospital-acquired respiratory pathogen was not  
184 associated with fatal outcome. However, poor clinical outcome was associated with enrichment  
185 of the lower airway microbiota with an oral commensal (*Mycoplasma salivarium*), while high  
186 SARS-CoV-2 viral burden, poor anti-SARS-CoV-2 antibody response, together with a unique  
187 host transcriptome profile of the lower airways were most predictive of mortality. Collectively,  
188 these data support the hypothesis that 1) the extent of viral infectivity drives mortality in severe  
189 COVID-19, and therefore 2) clinical management strategies targeting viral replication and host  
190 responses to SARS-CoV-2 should be prioritized.

191

192

193

194

195

196

197

198 **Introduction**

199 The earliest known case of Severe Acute Respiratory Syndrome Coronavirus 2 (SARS-  
200 CoV-2) infection causing coronavirus virus disease (COVID-19) is thought to have  
201 occurred on November 17, 2019<sup>1</sup>. As of February 20, 2021, 110.3 million confirmed  
202 cases of COVID-19 and 2.4 million deaths have been reported worldwide<sup>2</sup>. As the  
203 global scientific community rallied in a concerted effort to understand SARS-CoV-2  
204 infections, our background knowledge is rooted in previous experience with the related  
205 zoonotic betacoronaviruses Middle East Respiratory Syndrome coronavirus (MERS-  
206 CoV) and SARS-CoV-1 that have caused severe pneumonia with 34.4% and 9% case  
207 fatality, respectively<sup>3</sup>. As observed for these related coronaviruses, SARS-CoV-2  
208 infection can result in an uncontrolled inflammatory response<sup>4</sup> leading to acute  
209 respiratory distress syndrome (ARDS) and multi-organ failure, both associated with  
210 increased mortality. While a large proportion of the SARS-CoV-2 infected population is  
211 asymptomatic or experiences mild illness, a substantial number of individuals will  
212 develop severe disease and require hospitalization, with some progressing to  
213 respiratory failure. Mortality among hospitalized COVID-19 patients is estimated to be  
214 approximately 20%, which can go up to 70% among those requiring invasive  
215 mechanical ventilation<sup>5-12</sup>.

216  
217 Mortality in other viral pandemics, such as the 1918 H1N1 and 2009 H1N1 influenza  
218 pandemics, has been attributed in part to bacterial co-infection or super-infection<sup>13,14</sup>.

219 To determine if this is also the case for COVID-19, we can use next generation  
220 sequencing (NGS) to probe the complexity of the microbial environment (including RNA  
221 and DNA viruses, bacteria and fungi) and how the host (human) responds to infection.



222 Recent studies have used this approach to uncover microbial signatures in patients with  
223 ARDS.<sup>15,16</sup> Increased bacterial burden and the presence of gut-associated bacteria in  
224 the lung were shown to worsen outcomes in these critically ill patients<sup>15,17</sup>, highlighting  
225 the potential role of the lung microbiome in predicting outcomes in ARDS. In a recent  
226 study using whole genome sequencing to profile the gut microbiome of 69 patients from  
227 Hong Kong, investigators identified an increased abundance of opportunistic fungal  
228 pathogens among patients with confirmed COVID-19<sup>18</sup>. While there is emerging interest  
229 in understanding the microbial environment in patients with SARS-CoV-2 infections, few  
230 studies have attempted to characterize this at the primary site of the disease activity:  
231 the lower airways<sup>19,20</sup>. Furthermore, no study has yet determined whether microbial  
232 differences in the airways of COVID-19 patients could be contributing to the different  
233 outcomes in patients receiving mechanical ventilation.

234  
235 In this investigation, we accessed a large prospective cohort of critically ill patients with  
236 SARS-CoV-2 infection who required invasive mechanical ventilation, and from whom  
237 bronchoalveolar lavage (BAL) samples were collected. We characterized the lung  
238 microbiome of these patients in parallel with analyses of lower airway markers of host  
239 immunity. While we did not find that isolation of a secondary respiratory pathogen was  
240 associated with prolonged mechanical ventilation (>28 days) or fatal outcome, we did  
241 identify critical microbial signatures—characterized by enrichment of oral commensals,  
242 high SARS-CoV-2 load, and decreased anti-SARS-CoV-2 IgG response—associated  
243 with fatal outcome, suggesting a need for more targeted antiviral therapeutic  
244 approaches for the care of critically ill COVID19 patients.

245

## 246 **Results**

### 247 Cohort

248 From March 3<sup>rd</sup> to June 18<sup>th</sup> 2020, a total of 589 patients with laboratory-confirmed  
249 SARS-CoV-2 infection were admitted to the intensive care units of two academic  
250 medical centers of NYU Langone Health in New York (Long Island and Manhattan) and  
251 required invasive mechanical ventilation (MV). This included a subset of 142 patients  
252 from the Manhattan campus who underwent bronchoscopy for airway clearance and/or  
253 tracheostomy from which we collected and processed lower airway samples for this  
254 investigation (**Supplementary Fig. 1**). **Table 1** shows demographics and clinical  
255 characteristics of the 142 patients who underwent bronchoscopy divided into three  
256 clinical outcomes: survivors with  $\leq 28$  Days on MV; survivors with  $>28$  Days on MV; and  
257 deceased. The median post admission follow-up time was 232 days (CI=226-237 days).  
258 **Supplementary Tables 1** and **2** compare similar data across all 589 subjects, divided  
259 per site and sub-cohorts. Patients at the Manhattan campus who underwent  
260 bronchoscopy were younger, had lower body mass index (BMI), and a lower prevalence  
261 of chronic obstructive pulmonary disease (COPD; **Supplementary Table 1**). Among the  
262 cohort that provided lower airway samples through bronchoscopy, 37% of the subjects  
263 were successfully weaned within 28 days of initiation of MV and survived  
264 hospitalization, 39% required prolonged MV but survived hospitalization, and 23% died.  
265 Patients within the bronchoscopy cohort had a higher overall survival than the rest of  
266 the NYU COVID-19 cohort since most critically ill patients were not eligible for  
267 bronchoscopy or tracheostomy. Mortality among those in the no-bronchoscopy cohort  
268 was 77%. In the overall NYU cohort, higher age and BMI were associated with  
269 increased mortality (**Supplementary Table 2**). There was a similar, albeit non-



270 significant, trend for the bronchoscopy cohort. Among the clinical characteristics of this  
271 cohort, patients within the deceased group more commonly had a past medical history  
272 of chronic kidney disease and cerebrovascular accident.

273 Study patients were admitted during the first wave of the pandemic in the US, prior to  
274 current standardized management of COVID-19. Within the bronchoscopy cohort, more  
275 than 90% of the subjects received hydroxychloroquine and anticoagulation (therapeutic  
276 dose), 69% received corticosteroids, 41% received tocilizumab (anti-Interleukin (IL)-6  
277 receptor monoclonal antibody), 21% required dialysis, and 18.9% were started on  
278 extracorporeal membrane oxygenation (ECMO) (**Table 1**). Antimicrobial therapy  
279 included use of antivirals (lopinavir/ritonavir in 16% and remdesivir in 10%), antifungals  
280 (fluconazole in 40% and micafungin in 57%), and antibiotics (any, in 90% of the  
281 subjects). Among the factors associated with clinical outcome within the bronchoscopy  
282 cohort, patients who survived were more commonly placed on ECMO whereas patients  
283 who died had frequently required dialysis (**Table 1**); these trends were also observed  
284 across the whole NYU cohort. Neither hydroxychloroquine or azithromycin were  
285 significantly associated with clinical outcome; however, patients who survived were  
286 more frequently treated with the combination antibiotic piperacillin/tazobactam.

287  
288 Within the first 48hrs from admission, respiratory bacterial cultures were rarely obtained  
289 (n=70/589, 12%) with very few positive results (n=12, 17%). Blood cultures were more  
290 commonly obtained (n=353/589, 60%) but the rate of bacterial culture positivity was  
291 much lower (n=5, 1.4%). These data support that community acquired bacterial co-  
292 infection was not a common presentation among critically ill COVID-19 patients.

293

294 During their hospitalization, most patients had respiratory and/or blood specimens  
295 collected for bacterial cultures (**Table 1** and **Supplementary Table 1**). The proportions  
296 of positive bacterial respiratory cultures and blood cultures were 73% and 43%,  
297 respectively. We evaluated whether respiratory or blood culture results obtained as per  
298 clinical standard of care were associated with clinical outcome. Risk analyses for the  
299 culture results during hospitalization for the whole cohort (n=589) demonstrated that  
300 bacterial culture positivity was not associated with increased odds of dying but was  
301 associated with prolonged mechanical ventilation in the surviving patients (**Figure 1**).  
302 Since length of stay could potentially affect these results (patients who died could have  
303 a shorter hospitalization, and therefore may have had fewer specimens collected for  
304 cultures), we repeated the analysis using culture data obtained during the first two  
305 weeks of hospitalization. This analysis showed that bacterial pathogen culture positivity  
306 (both respiratory and blood) during the early period of hospitalization was not  
307 associated with worse outcome (**Figure 1** and **Supplementary Table 3**). Interestingly,  
308 identification of oral bacteria in respiratory culture, commonly regarded as procedural  
309 contaminants, was associated with higher odds of prolonged mechanical ventilation  
310 (>28 days) among survivors. Similar trends were noted when analysis was performed  
311 on subjects from NYU LI and NYU Manhattan separately, or for the bronchoscopy  
312 cohort (**Supplementary Table 2**). Among the bronchoscopy cohort, there was no  
313 statistically significant association between culture results and clinical outcome, but  
314 there was a trend towards an increased rate of positive respiratory cultures for  
315 *Staphylococcus aureus* (including MRSA), *S. epidermidis*, and *Klebsiella pneumoniae* in  
316 the survival groups (**Table 1**). These data suggest that in critically ill patients with  
317 COVID-19 requiring MV, hospital isolation of a secondary respiratory bacterial pathogen

318 is not associated with worse clinical outcome.

319

320 *SARS-CoV-2 load in the lower airways is associated with poor clinical outcome*

321 Using supraglottic and BAL samples from patients undergoing bronchoscopy (n=142),  
322 we evaluated the viral load by rRT-PCR for the SARS-CoV-2 N gene, adjusted by levels  
323 of human ribosomal protein (RP). Of note, the majority of samples were largely obtained  
324 in the second week of hospitalization (**Table 1**, median[IQR] = 10[6-14], 13[8-16], and  
325 13[8-16] for the  $\leq 28$ -days MV,  $>28$ -days MV, and deceased groups, respectively,  $p=ns$ ).  
326 Paired analysis of upper and lower airway samples revealed that, while there was a  
327 positive association between SARS-CoV-2 viral load of the paired samples ( $\rho = 0.60$ ,  
328  $p < 0.0001$ ), there was a subset of subjects (21%) for which the viral load was greater in  
329 the BAL than in the supraglottic area, indicating topographical differences in SARS-  
330 CoV-2 replication (**Figure 2a**). Importantly, while the SARS-CoV-2 viral load in the  
331 upper airway samples was not associated with clinical outcome (**Supplementary Fig.**  
332 **2**), patients who died had higher viral load in their lower airways than patients who  
333 survived (**Figure 2b**). We then evaluated virus viability in BAL samples by measuring  
334 levels of subgenomic RNA (sgRNA) targeting the E gene of SARS-CoV-2. This mRNA  
335 is only transcribed inside infected mammalian cells and is not packed into virions, thus,  
336 its presence is indicative of viable infecting viral particles in a sample<sup>21</sup>. In BAL, levels of  
337 sgRNA correlated with viral load as estimated by rRT-PCR for the SARS-CoV-2 N gene  
338 (**Figure 2c**) and the highest percentage of measurable sgRNA was in the deceased  
339 group followed by the  $\leq 28$ -days MV group, and the  $>28$ -days MV group (17.7%, 11.5%,  
340 and 3.7%, respectively, chi-square  $p=0.028$  for the comparison deceased vs.  $>28$ -days  
341 MV group). Thus, while in most cases levels of sgRNA were not measurable in BAL

342 suggesting that there were no viable viral particles in the lower airways of COVID-19  
343 patients at the time of bronchoscopy (overall median[IQR] = 12[7-16] days from  
344 hospitalization), the lower airway viral burden, as estimated by rRT-PCR, is associated  
345 with mortality in critically ill COVID-19 patients.

346

347 *Microbial community structure of the lower airways is distinct from the upper airways in*  
348 *critically ill patients.*

349 Considering the bacterial species and the viral loads identified in the lower and upper  
350 airways of this cohort and their association with outcomes, we profiled in detail their viral  
351 and microbial composition. Microbial communities were evaluated using parallel  
352 datasets of RNA and DNA sequencing from 118 COVID-19 patients with lower airway  
353 samples that passed appropriate quality control and a subset of paired 64 upper airway  
354 samples, along with background bronchoscope controls.

355

356 RNA sequencing (RNAseq) of the metatranscriptome provided insight into the RNA  
357 virome as well as the transcriptomes of DNA viruses, bacteria, and fungi. Given the low  
358 biomass of lower airway samples we first identified taxa as probable contaminants by  
359 comparing the relative abundance between background bronchoscope and BAL  
360 samples (**Supplementary Fig. 3a** and **Supplementary Table 4**). However, we did not  
361 remove any taxa identified as probable contaminants from subsequent analyses. A  
362 comparison of the microbial community complexity captured in these data, determined  
363 using the Shannon diversity Index, showed there was significantly lower  $\alpha$  diversity in  
364 the lower airway samples than in the upper airways and background controls  
365 (**Supplementary Fig. 4a**). Similarly,  $\beta$  diversity analysis based on the Bray Curtis

366 Dissimilarity index indicated that the microbial composition of the lower airways was  
367 distinct from the upper airways and background controls (**Supplementary Fig. 4b**,  
368 PERMANOVA  $p < 0.01$ ). Sequence reads indicated a much higher relative abundance of  
369 SARS-CoV-2 in the lower than in the upper airways for this cohort (**Supplementary Fig.**  
370 **4c**). Comparisons of the most dominant bacterial and fungal taxa that were functionally  
371 active showed that *S. epidermidis*, *Mycoplasma salivarium*, *S. aureus*, *Prevotella oris*,  
372 and *Candida albicans*, many often-considered oral commensals, were present in both  
373 upper and lower airway samples (**Supplementary Fig. 4c**). Interestingly, the lytic phage  
374 Proteus virus Isfahan, known to be active against biofilms of *Proteus mirabilis*<sup>22</sup>, was  
375 found to be highly transcriptionally active in the BAL.

376  
377 DNA sequencing data provided insight into the DNA virome, as well as the bacterial and  
378 fungal metagenomes. As for the metatranscriptome data, we first identified taxa as  
379 probable contaminants but these were not removed for subsequent analyses  
380 (**Supplementary Fig. 3b**). Both  $\alpha$  and  $\beta$  diversity analyses of the metagenome support  
381 distinct microbial community features in the lower airways as compared with the upper  
382 airways and background controls (**Supplementary Fig. 5a, 5b**). Among the top 10 taxa  
383 across lower and upper airway samples were *S. aureus*, *Salmonella enterica*,  
384 *Burkholderia dolosa*, and *Klebsiella variicola*. *Candida albicans* only ranked #77 in the  
385 BAL while it was ranked 5<sup>th</sup> in the metatranscriptome data indicating that while present  
386 at low relative abundance, it was highly active (**Supplementary Table 4**). *K. variicola*,  
387 while prevalent at a high relative abundance (#4 in BAL, and #5 in the upper airways) in  
388 patients of this cohort, its ranking in the RNAseq data was not among the top 50,  
389 indicating that it was not as active functionally as other bacteria. Conversely, while *S.*

390 *epidermis* ranked as the most highly functional taxon in both lower and upper airways,  
391 based on RNAseq reads (**Supplemental Fig. 3c**), it was 33<sup>rd</sup> in relative abundance in  
392 the BAL DNaseq data but was present at very high relative abundance in the upper  
393 airways (ranked #3). These data suggest that microbes that colonize the upper airways  
394 and the skin were common in the lower airways in this cohort of COVID-19 patients  
395 requiring invasive mechanical ventilation.

396

397 *Distinct microbial signatures are associated with different clinical outcomes.*

398 To determine the potential impact of vertebrate viruses on outcome, we compared virus  
399 enrichment differences in BAL samples across the three clinical outcome groups ( $\leq 28$ -  
400 days MV,  $> 28$ -days MV, and deceased). As it pertains to the vertebrate RNA virome  
401 subfraction, there were significant differences ( $\beta$  diversity) between the three clinical  
402 outcome groups (**Supplementary Fig. 6**, PERMANOVA  $p < 0.01$ ). There were no  
403 significant differences for the vertebrate DNA virome or DNA virus transcriptome  
404 subfractions of the sequence reads (data not shown). Consistent with the SARS-CoV-2  
405 viral load assessed by RT-PCR, differential expression analysis (DESeq) of the RNA  
406 virome identified SARS-CoV-2 as being enriched in the deceased group, as compared  
407 with both  $\leq 28$ -days and  $> 28$ -days MV groups (fold change  $> 5$ , **Figure 2d**). Cox  
408 proportional hazards modeling supports that enrichment with SARS-CoV-2 was  
409 associated with increased risk for death (HR 1.33, 95% CI= 1.07-1.67,  $p$ value=0.011,  
410 FDR adjusted  $p$ value=0.06; **Supplementary Table 5**).

411

412 Analysis of differential DNA virus abundance using DEseq did not show statistically  
413 significant differences. Because the virome includes viruses of bacteria and archaea,

414 we also analyzed the phage data (including viruses of archaea). Phages impact the  
415 bacterial population—including bacterial pathogens—and so could be clinically relevant.  
416 At a compositional level, the virome of DNA phages did not display statistically  
417 significant differences or significant virus enrichment based on clinical outcome groups  
418 (data not shown). However, while the phage metatranscriptome  $\alpha$  and  $\beta$  diversity was  
419 similar across the clinical outcome groups, there were various taxonomic differences at  
420 the RNA level with enrichment of *Staphylococcus* phages CNP $\times$  in the deceased and  
421 >28-day MV groups when compared with the  $\leq$ 28-day MV group (**Figure 2e**).  
422 Differential expression from two other *Staphylococcus* phages was also observed in the  
423 >28-days MV group as compared with the  $\leq$ 28-days MV group (**Figure 2e**). None of the  
424 described taxa were identified as possible contaminants (**Supplementary Table 4**).

425  
426 *Enrichment of the lower airway microbiota with oral commensals is associated with poor*  
427 *outcome*

428 We evaluated the overall bacterial load by quantitative PCR, targeting the 16S rRNA  
429 gene. As expected, the bacterial load in the lower airways was several folds lower than  
430 in the upper airways but clearly higher than the background bronchoscope control  
431 (**Supplementary Fig. 7**). Patients who died had higher total bacterial load in their lower  
432 airways than patients who survived (**Figure 3a**).

433  
434 While no statistically significant differences were noted in  $\alpha$  or  $\beta$  diversity across clinical  
435 outcome groups (**Figure 3b-c**), several differences were noted when differential  
436 enrichment was evaluated using DESeq. For the comparisons made across the clinical  
437 outcome groups we focused on consistent signatures identified in the lower airway



438 metagenome and metatranscriptome. Coherence of differentially enriched taxa was  
439 determined by gene set enrichment analysis (GSEA) (**Figure 3d**) and directionality of  
440 enrichment between the two datasets was evaluated (**Figure 3e**). Among the most  
441 abundant taxa, the oral commensal *M. salivarum* was enriched in the deceased and  
442 >28-days MV groups as compared with the  $\leq$ 28-days MV group. In contrast, a different  
443 oral commensal, *Prevotella oris*, was enriched in the  $\leq$ 28-days MV group as compared  
444 with the deceased and >28-days MV groups. These data support that oral commensals  
445 are frequently found in the lower airways of critically ill COVID-19 patients and that  
446 differences between groups could be due to differential microbial pressures related to  
447 host factors. Interestingly, most of the statistically significant taxa were identified in the  
448 metatranscriptome rather than in the metagenome data, with only *P. oris* identified in  
449 both datasets. None of the described taxa were identified as possible contaminants  
450 (**Supplementary Table 4**). Overall, most of the microbial signatures identified as  
451 enriched in the deceased or in subjects on prolonged MV are regular colonizers of  
452 healthy skin and mucosal surfaces rather than frequent respiratory pathogens.

453  
454 For the fungal data, there were no statistically significant differences in  $\alpha$  or  $\beta$  diversity  
455 identified between clinical outcome groups in the metagenome or the  
456 metatranscriptome data (**Supplementary Fig. 8a** and **8c**). However, in the  
457 metagenome data, we identified *Candida glabrata* enriched in the deceased group as  
458 compared with the  $\leq$ 28-days MV and the >28-days MV groups but this was not  
459 consistent in the metatranscriptome data (**Supplementary Fig. 8b** and **8d**).

460

461 *Poor clinical outcomes are associated with enrichment of antimicrobial resistance genes*  
462 *and glycosphingolipid biosynthesis*

463 We used the gene annotation of the DNaseq and RNAseq data to profile the microbial  
464 functional potential of the lower airway samples. For the comparisons made across the  
465 clinical outcome groups, we focused on consistent functional signatures identified in the  
466 lower airway metagenome and metatranscriptome. Coherence of differentially enriched  
467 functions was determined using GSEA (**Figure 4a**) and directionality of enrichment was  
468 also evaluated (**Figure 4b**). Overall, there was coherence of directionality between the  
469 metatranscriptomics and metagenomics datasets for the comparisons between deceased  
470 vs  $\leq 28$ -days MV, and  $> 28$ -days MV vs  $\leq 28$ -days MV groups. Interestingly, statistically  
471 significant differences were only noted in the metatranscriptome data and not in the  
472 metagenome data. Among the top differentially expressed pathways in the poor  
473 outcome groups were glycosylases, oxidoreductase activity, transporters, and two-  
474 component system, among other genes. The two-component system is used by  
475 bacteria and fungi for signaling. A specific analysis of antibiotic resistance genes shows  
476 that there was significant gene enrichment and expression of biocide resistance in the  
477 deceased group as compared to the two other MV groups (**Supplementary Fig. 9**).  
478 There was also significant expression of genes resistant to trimethoprim and phenolic  
479 compound, as well as multi drug resistance in the deceased group as compared to the  
480  $\leq 28$ -days MV group. Presence of the resistance gene against Trimethoprim was not  
481 significantly associated with prior exposure with Trimethoprim. However, only 7 patients  
482 received this drug before sample collection.

483

484 Lower airway host immune phenotype shows failure of adaptive and innate immune  
485 response to SARS-CoV-2 among deceased subjects

486 To evaluate the host immune response to SARS-CoV-2 infection, we first measured  
487 levels of anti-Spike and anti-RBD (receptor binding domain) antibodies in BAL samples.  
488 For both anti-Spike and anti-RBD immunoglobulins, levels of IgG, IgA and IgM were  
489 several logs higher than levels found in BAL samples from non-SARS-CoV-2 infected  
490 patients. Importantly, IgG levels of anti-Spike and anti-RBD were significantly lower in  
491 the deceased group as compared to the levels found in patients who survived (**Figure**  
492 **5a** and **Supplementary Fig. 10a-c**,  $p < 0.05$ ). A neutralization assay performed using  
493 BAL fluid showed varying levels of neutralization across all samples (as estimated by  
494 EC50) but no statistically significant differences between the clinical outcome groups  
495 (**Supplementary Fig. 10d**). We then evaluated whether levels of antibodies correlated  
496 with viral load in BAL samples. While viral load levels of SARS-CoV-2 measured with  
497 rRT-PCR did not correlate with BAL measurements of SARS-CoV-2 specific antibodies,  
498 sgRNA viral load levels negatively correlated with BAL levels of Anti-Spike (IgG and  
499 IgA), Anti-RBD (IgG and IgA) and the Neutralization assay (**Supplementary Table 6**).  
500 These data suggest that the IgG subfraction is an important marker of the adaptive  
501 immune response in the lung of critically ill COVID-19 patients and that both sub-  
502 fractions of IgG and IgA anti-SARS-CoV-2 may contribute to the viral replication control  
503 in the lower airways.

504  
505 Host transcriptome analyses of BAL samples showed significant differences across  
506 clinical outcome groups based on  $\beta$  diversity composition (**Supplementary Fig. 11**). We  
507 identified multiple differentially expressed genes across the clinical outcome groups

508 **(Supplementary Fig. 11b-d)**. First, we noted that the lower airway transcriptomes  
509 showed downregulation of heavy constant of IgG (IGHG3), and heavy constant of IgA  
510 (IGHA1) genes in those with worse clinical outcome **(Supplementary Table 7)**. We  
511 then used IPA (Ingenuity Pathway Analysis) to summarize differentially expressed  
512 genes across the three clinical outcome groups **(Figure 5b)**. The sirtuin Signaling  
513 Pathway (a pathway known to be involved in aging, gluconeogenesis/lipogenesis, and  
514 host defense against viruses)<sup>23</sup> and the ferroptosis pathway (an iron-dependent form of  
515 regulated cell death present in bronchial epithelium)<sup>24,25</sup> were both upregulated in those  
516 with worse outcome. While this may reflect the host response to viral infection, other  
517 differences in the transcriptomic data showed downregulation of mitochondrial oxidative  
518 phosphorylation, HIF1 $\alpha$ , STAT3, and Phospholipase C Signaling. Additional canonical  
519 signaling pathways, including insulin secretion, multiple Inositol related pathways,  
520 noradrenaline/adrenaline degradation signaling, and xenobiotic related metabolism  
521 were significantly downregulated when comparing the >28-days MV vs.  $\leq$ 28-days MV  
522 groups. Upstream pathway prediction analyses of the host airway transcriptome support  
523 previously reported mitochondria dysfunction<sup>26</sup> (inhibition in mitochondrial related  
524 regulators NSUN3, MRPL14, MRPL12, LONP1, DAP3), and metabolic/gluconeogenesis  
525 dysregulation<sup>27,28</sup> (SIRT3) in critically ill COVID-19 subjects with poor outcome  
526 **(Supplementary Table 8)**. We also observed decreased activation in the inflammatory  
527 response in critically ill COVID-19 subjects with poor outcome (phagocytes, neutrophils,  
528 and granulocytes, and leukocytes; **Supplementary Table 9**). A comparison of clinical  
529 outcome between the >28-days MV vs.  $\leq$ 28-days MV groups showed upstream  
530 predicted inhibition in insulin, estrogen, beta-estradiol, EGF, EGFR, IL-5, and IL-10RA  
531 in the >28-days MV group **(Supplementary Table 9)**. These differences suggest that, at

532 the stage that we sampled the lower airways of patients with critically COVID-19, an  
533 overt inflammatory tone was not predictive of worst outcome.

534

535 To determine if the abundance of immune cells varies between different clinical  
536 outcome groups, we estimated cell type abundance from the host transcriptome with  
537 computational cell type quantification methods, including a deconvolution approach  
538 implemented in CIBERSORTx<sup>29</sup> and a cell type signature enrichment approach  
539 implemented in xCell<sup>30</sup>. As reported recently in other studies<sup>31</sup>, among the cell types  
540 detected in the BAL samples we observed a consistent enrichment of mast cells and  
541 neutrophils in the >28-days MV and deceased groups compared with the ≤28-days MV  
542 group (**Figure 5c** and **Supplementary Table 10**). We also identified significantly higher  
543 inflammatory macrophages (M1), innate T-cells and memory T-cells (CCR7<sup>+</sup>) among  
544 subjects with worse clinical outcome.

545

546 *Cross-kingdom network analyses identify bacteria, fungi, and host pathways functionally*  
547 *impacted by SARS-CoV-2*

548 To identify potential microbe-microbe and microbe-host interactions that could have an  
549 effect on outcome, we used a multi-scale network analysis approach (Multiscale  
550 Embedded Gene co-Expression Network Analysis, MEGENA)<sup>32</sup>. We first used the  
551 relative abundance from the RNAseq data to capture co-expressing taxa in the  
552 metatranscriptome network neighborhood of SARS-CoV-2 (SARS2-NWN). We  
553 examined five such network neighborhoods (constructed by including nodes with  
554 increasing distance 1 to 5 from SARS-CoV-2, i.e. neighborhood 1 to neighborhood 5)  
555 that were significantly enriched for taxa functionally active in the deceased group when

556 compared with the  $\leq 28$ -day MV group. Only the largest cluster, with 504 taxa, had  
557 significantly enriched taxa in both the deceased and in the  $\leq 28$ -day MV outcome groups  
558 (**Supplementary Fig. 12a**) (FET P-value =  $4.6e-45$ , 4.0 FE). Many of these taxa are  
559 among the top 50 most abundant microbes we had previously identified in the  
560 metatranscriptome dataset. Taxa present that are influenced by SARS-CoV-2 and  
561 significantly differentially enriched in the deceased group include bacteria such as *M.*  
562 *salivarium*, *Bifidobacterium breve*, and *Lactobacillus rhamnosus* (a gut commensal),  
563 that we had previously identified by differential expression analysis (**Figure 3e**), but also  
564 taxa such as *S. epidermis*, *Mycoplasma hominis* (urogenital bacteria), and the phage  
565 VB\_PmiS-Isfahan (also referred to as Proteus virus Isfahan) that we had previously  
566 only picked up as being highly abundant but not necessarily differentially enriched in the  
567 deceased group. Most of the fungi, such as *C. albicans*, *C. glabrata* and *C. orthopsilosis*  
568 were enriched in the  $\leq 28$ -day MV group. Interestingly, our earlier analysis of the  
569 metagenome (**Supplementary Fig. 8b**) had identified *C. glabrata* as being enriched in  
570 the deceased group with no enrichment in the metatranscriptome. This analysis  
571 indicates that some of these abundant taxa could be responding to SARS-CoV-2  
572 disruption in a similar manner, or indirectly interacting functionally.

573

574 We further investigated the association of the network neighborhood with host network  
575 modules using the host transcriptome data to identify groups of host genes that are co-  
576 expressed in response to SARS-CoV-2 disruption. The 3 host modules with the most  
577 significant correlations to SARS2-NWN are M175, M277 and M718. M277 is the parent  
578 module of M718, and both are enriched with genes related to respiratory electron  
579 transport, while M175 is enriched for IFN- $\gamma$  signaling (**Supplementary Fig. 12b**).

580 Module M175 is positively correlated with the SARS2-NWN ( $\rho = 0.32$ , P-value =  $2.1e-3$ ).  
581 While there was no collective enrichment of the module by differentially expressed  
582 genes (DEGs) in the deceased vs  $\leq 28$ -days MV, there was for  $> 28$ -days vs  $\leq 28$ -days  
583 MV (FET P-value = 0.030, 4.5 FE). This module includes well-known antiviral IFN  
584 stimulated genes (ISGs), such as *IRF7* and *OASL*. Investigating module response on an  
585 individual gene level, Interleukin 4 induced 1 (*IL4I1*) appears as one of the most up-  
586 regulated genes in this module when comparing the deceased group with the  $\leq 28$ -day  
587 MV group. The transporter 1, ATP binding cassette subfamily B member (*TAP1*) is also  
588 upregulated and a key regulator (hub gene). Together with *TAP2*, *TAP1* plays a central  
589 role in MHC I antigen presentation<sup>33</sup>. Transcriptional regulators *SP110* and *SP140*, both  
590 ISGs and also identified as hub genes, were down-regulated. Module 718 was also  
591 positively correlated with the SARS2-NWN ( $\rho = 0.31$ , P-value =  $1.3e-3$ ; enrichment FET  
592 P-value = 0.029, 3.7 FE of M178 by differentially expressed genes in deceased vs  $\leq 28$ -  
593 days MV). The majority of genes in this module are down-regulated in the deceased  
594 group compared with the  $\leq 28$ -day group. Some of the genes encode subunits of the  
595 mitochondrial ATP synthase, such as *ATP6* and *ATP8*, the cytochrome C oxidase, with  
596 *COX2* and *COX3* as well as the NADH dehydrogenase complex, such as *ND1-ND6*.  
597 *ND4L*, *ATP6*, *COX2*, *ND1*, *ND3*, *ND4L* and *ND6* are key regulators, potentially  
598 modulating the expression of the other genes in the module. These findings further  
599 support mitochondria dysfunction<sup>26</sup>, potentially disrupting processes indicated by the  
600 module. Other down-regulated genes are humanin1 (*MTRNR2L1*) and R-spondin 1  
601 (*RSPO1*). Humanin is known to protect against oxidative stress and mitochondrial  
602 dysfunction<sup>34</sup>. *RSPO1* protects against cell stress by activating the Wnt/ $\beta$ -catenin  
603 signaling pathway<sup>35</sup>. Non-coding RNAs, such as *MALAT1* and *RHOQ-AS1* were found



604 to be up-regulated. *MALAT1* is known to suppress IRF3-initiated antiviral innate  
605 immunity<sup>36</sup> while the function of *RHOQ-AS1* is unknown.

606

607

### 608 *Metatranscriptome and Transcriptome signatures are predictive of mortality*

609 We evaluated the strength of the metatranscriptomic, metagenomic and host  
610 transcriptomic profiles to predict mortality in this cohort of critically ill COVID-19 patients.

611 To this end, we identified features in each of these datasets and constructed risk scores

612 that best predicted mortality. **Figure 6a** shows that the metatranscriptome data, alone or

613 combined with the other two datasets, was most predictive of mortality. Importantly, the

614 predictive power (as estimated by the area under the curve) of the metatranscriptome

615 data was improved by excluding probable contaminants and worsened when SARS-

616 CoV-2 was removed from the modeling. The selected features we used to construct the

617 metatranscriptome, metagenome and host transcriptome risk scores are reported in

618 **Supplementary Table 11**). Using the means of the scores, we classified all subjects

619 into high risk and low risk groups for mortality. **Figure 6b** shows Kaplan-Meier survival

620 curve comparisons evaluating the predictive power of risk score stratification based on

621 metatranscriptome, metagenome and host transcriptome data. Combining risk scores

622 from different datasets showed an optimal identification of mortality when

623 metatranscriptome and host transcriptome were considered (**Figure 6c**). We then used

624 the gene signature found as being the most predictive of mortality to conduct IPA

625 analyses. Among the upstream regulators, mortality was associated with predicted

626 activation of interferon alpha while chemotaxis and infection by RNA virus were

627 predicted as activated in diseases and functions. These data highlight the importance of

628 SARS-CoV-2 abundance in the lower airways as a predictor for mortality, and the  
629 significant contribution of the host cell transcriptome, which reflects the lower airway cell  
630 response to infection.

631 **Discussion**

632 A limited number of studies to date have evaluated the lower airway microenvironment  
633 in patients with SARS-CoV-2 infection because of the increased risk of virus  
634 transmission to healthcare providers during sampling<sup>19,20,37-42</sup>. This has limited  
635 molecular investigations into the primary site of the disease. Having built a substantial  
636 biorepository of lower airway samples among COVID-19 patients on mechanical  
637 ventilation recruited during the first wave of SARS-CoV-2 infections in New York City,  
638 we used a metagenomic approach to characterize the microbiome in the lower airways  
639 and assessed its impact on clinically meaningful outcomes. In this analysis of 142  
640 critically ill hospitalized patients with confirmed SARS-CoV-2 infection and lower airway  
641 biorepository samples available, we determined that higher SARS-CoV-2 viral load,  
642 higher relative abundance of *Mycoplasma salivarium*, and limited anti-SARS-CoV-2  
643 Spike protein IgG response in the lower airways were associated with increased  
644 mortality. This signature was supported by the metatranscriptome data of the lower  
645 airway samples where SARS-CoV-2 sequence reads were significantly enriched in  
646 those patients who died compared to those who survived after developing respiratory  
647 failure requiring mechanical ventilation. Importantly, although we observed changes in  
648 other microbial components of the lower airway microbiome in our analysis of lower  
649 airway samples from 118 patients and by clinical laboratory culture results obtained  
650 from 589 patients, we did not find evidence to support the hypothesis that co-infection  
651 with common (bacterial, viral, fungi) respiratory pathogens was associated with poor  
652 outcome—although most patients received empiric treatment with broad spectrum  
653 antibiotics and anti-fungals.

654

655 Several studies have explored the relationship between SARS-CoV-2 viral load and  
656 mortality<sup>43-48</sup>. Severe influenza requiring hospitalization has also been associated with  
657 higher viral loads<sup>49,50</sup>. It has been argued that high viral load might merely be a  
658 reflection of an individual's immune response<sup>43</sup>. In fact, in SARS-CoV-1, clinical  
659 progression was not associated with increased viral load or uncontrolled viral replication  
660 in the nasopharynx but rather with an upregulated immune profile in these patients<sup>51</sup>. In  
661 a large cohort of 1145 patients with confirmed SARS-CoV-2, viral load measured in  
662 nasopharyngeal swab samples was found to be significantly associated with mortality,  
663 even after adjusting for age, sex, race and several co-morbidities<sup>48</sup>. Similar results were  
664 found in a cohort of patients in New York City with or without cancer, where in-hospital  
665 mortality was significantly associated with a high SARS-CoV-2 viral load in the upper  
666 airways<sup>47</sup>. The data presented here through the use of direct quantitative methods  
667 (RT-PCR) and a semiquantitative untargeted approach (metatranscriptome sequencing)  
668 support the hypothesis that the SARS-CoV-2 viral load in the lower airways plays a  
669 critical role in the clinical progression of critically ill COVID-19 patients. It is important to  
670 note that current guidelines for treatment of COVID-19 do not recommend treatment  
671 with remdesivir for patients receiving invasive mechanical ventilation<sup>52</sup>. The results of  
672 this investigation suggest that antivirals might still have a role in the treatment of  
673 critically ill COVID-19 patients.

674

675 We investigated the possibility that mortality with SARS-CoV-2 infection was related to  
676 co-infection with other pathogens. To this point several investigations have shown  
677 evidence of SARS-CoV-2 co-infection with other viruses, bacteria and fungi identified by  
678 culture-based techniques<sup>18,53-60</sup>. In a cohort of 116 specimens positive for SARS-CoV-

679 2, 21% were positive for one or more additional respiratory pathogens including  
680 rhinovirus/enterovirus and respiratory syncytial virus<sup>53</sup>. In a meta-analysis of 3,338  
681 patients with COVID-19, only 3.5% of patients had an identified bacterial co-infection at  
682 admission, while 14.3% were found later to have a secondary bacterial infection<sup>55</sup>. The  
683 most common pathogens identified included species in the genera *Mycoplasma*,  
684 *Hemophilus*, and *Pseudomonas*. In another study, the most commonly identified co-  
685 infections were with *Streptococcus pneumoniae*, *Klebsiella pneumoniae*, and  
686 *Haemophilus influenzae*<sup>57</sup>. Using detailed clinical laboratory culture data available for  
687 589 subjects hospitalized with respiratory failure due to COVID-19, we showed that  
688 higher rates of respiratory infection with other organisms, especially early in their  
689 hospitalization, did not occur among subjects with poor clinical outcome. Further, we did  
690 not observe an association between positive cultures for any pathogen tested and  
691 increased odds of dying in critically ill COVID-19 patients.

692  
693 In the subset of COVID-19 patients with BAL samples, we used NGS to identify all  
694 potential pathogens and commensals in the lower airways beyond microbial cultures  
695 routinely obtained as per clinical care. The RNA virome data showed that SARS-CoV-2  
696 dominates the lower airways and was significantly associated with death. A small  
697 number of samples had a few sequences that mapped to influenza A or B viruses,  
698 suggesting that co-infection with influenza did not occur frequently during this first wave  
699 of SARS-CoV-2 infections. Within the DNA virome, there was no significant difference in  
700 viruses between the three outcome groups despite the frequent finding of HSV-1.  
701 Similarly, when evaluating the metatranscriptome of DNA viruses, there were few  
702 differences between the three outcome groups. Although analysis of the phage

703 metagenome data showed no differential enrichment between the three cohorts, we did  
704 identify in the metatranscriptome data differentially active phages when comparing the  
705 three cohorts, suggesting that changes in the bacterial microbiome may be occurring in  
706 critically ill patients with COVID-19. Certain *Staphylococcus* phages were differentially  
707 active in those who were ventilated for more than 28 days and in those who died.  
708 Interestingly, the bacterial signatures also identified *Mycoplasma salivarium*, a known  
709 oral commensal that has previously been associated with ventilator-acquired  
710 pneumonia<sup>61</sup>, as differentially active in those who died and those who were ventilated  
711 for more than 28 days when compared to those ventilated less than 28 days. From  
712 previous data published by us, enrichment of the lower airway microbiota with oral  
713 commensals was seen to be associated with a pro-inflammatory state in several  
714 diseases including lung cancer<sup>62,63</sup> and non-tuberculosis mycobacterium related  
715 bronchiectasis<sup>64</sup>.

716

717 With the use of metagenomic and metatranscriptomic analyses it is also possible to  
718 examine how functionally active microbes impact the host<sup>65</sup>. In this cohort of patients,  
719 we evaluated the functional profile of the microbiome within the lower airways and its  
720 effect on mortality, something that, to our knowledge, had not yet been assessed in  
721 COVID-19 patients. The only significant gene function enrichment was found with the  
722 metatranscriptome data suggesting that functional activation of microbes can provide  
723 further insights into the lower airway microbial environment of patients with worst  
724 outcome. Among the pathways that were differentially expressed in those patients with  
725 poor outcome, we identified genes associated with degradation, transport, and  
726 antimicrobial resistance genes, as well as with signaling. These differences may

727 indicate important functional differences leading to a different metabolic environment in  
728 the lower airways that could impact host immune responses. It could also be  
729 representative of differences in microbial pressure in patients with higher viral loads and  
730 different inflammatory environments.

731  
732 In the current investigation, we also characterized the immune response within the  
733 lower airways by measuring anti-SARS-CoV-2 Spike antibodies and profiling the host  
734 RNA transcriptome. We observed that low levels of anti-Spike and anti-RBD IgG in the  
735 lung were associated with poor outcome. Although we did not find a statistically  
736 significant association between SARS-CoV-2 neutralizing capacity and poor outcome,  
737 levels of SARS-CoV-2 neutralizing antibodies, anti-Spike and anti-RBD antibodies (both  
738 IgG and IgA) were negatively correlated with SARS-CoV-2 viability. Prior investigations  
739 have suggested that IgA levels are a key driver of neutralization in the mucosa<sup>66-68</sup>. The  
740 differences noted in the current investigation in the IgG pools are intriguing and future  
741 work investigating the antibodies generated during SARS-CoV-2 infections will be  
742 essential.

743  
744 When examining host transcriptomic differences across the different clinical outcome  
745 groups, Sirtuin and Ferroptosis signaling pathways were found to be upregulated in the  
746 most critically ill COVID-19 patients. Upregulation in the Sirtuin pathway demonstrates  
747 an increased host inflammatory response to viral infection<sup>23</sup>. In addition, ferroptosis, a  
748 recently identified form of non-apoptotic regulated cell death through iron-dependent  
749 accumulation of lipid peroxides, has been shown to cause direct lung injury<sup>69</sup> or  
750 pulmonary ischemia-reperfusion injury<sup>70,71</sup>. Interestingly, there is evidence to support



751 that STAT3<sup>69</sup> and ACSL4<sup>70</sup> alleviated ferroptosis-mediated acute lung injury  
752 dysregulation, which are both down-regulated in COVID-19 patients with worse clinical  
753 outcome. Further analysis showed that there appeared to be an inactivation of  
754 phagocytes, neutrophils, granulocytes, and leukocytes, including downregulation of IgG  
755 expression levels, with additional mitochondria dysfunction, and down-regulation of  
756 Inositol related pathways and noradrenaline/adrenaline degradation. There is evidence  
757 that in the neonatal lung, inositol related components exert an anti-inflammatory effect  
758 and can prevent acute lung injury<sup>72,73</sup>.

759  
760 Collectively, these data suggest that an imbalance rather than an elevated inflammatory  
761 state in the lung is an important marker that predicts poor outcomes in critically ill  
762 COVID-19 patients. Indeed, the inferred cell composition analysis from the bulk  
763 transcriptome data overall points to a tepid immune response. Memory T cells have  
764 been implicated with a robust immune response in SARS-CoV-2.<sup>74</sup> The deficiency of  
765 these memory T cells that we found in the lungs of COVID-19 patients with worse  
766 outcome further supports the presence of an ineffective immune response or presence  
767 of immune exhaustion. IL4I1, found in the network analysis to be up-regulated in the  
768 deceased group in association with SARS-CoV-2, is an immunosuppression enzyme  
769 that plays a role in infection and the control of immunopathology<sup>75</sup>. IL4I1 induction has  
770 been reported in viral infections with influenza virus<sup>76</sup>. The ISGs and transcriptional  
771 regulators *SP110* and *SP140*, both downregulated in the deceased group. play  
772 important roles in resisting intracellular pathogens<sup>77</sup>.

773

774 Strikingly, interrogation of the host transcriptomic analysis identified survival-associated  
775 differences in interferon-related responses. Our host transcriptomic risk stratified model  
776 seems to point to a predictive activation of type I interferon as a prediction for mortality.  
777 This might be inconsistent with the current suggestion that, based on systemic levels,  
778 early interferon responses are associated with poor outcome in COVID19.<sup>78,79</sup> Others  
779 have suggested that a robust interferon response may lead to a hyperinflammatory  
780 state that could be detrimental in the disease process, justifying the use of Janus kinase  
781 inhibitor inhibitors in patients with COVID-19.<sup>80</sup> Studies comparing transcriptomic  
782 signatures in BAL of patients with severe COVID-19 and controls have shown activation  
783 of type 1 interferons.<sup>81</sup> While further longitudinal data will be needed to clarify the role of  
784 interferon signaling on the disease, the data presented here suggest that combining  
785 microbial and host signatures could help understand the increase risk for mortality in  
786 critically ill COVID-19 patients.

787  
788 By collecting BAL samples rather than endotracheal aspirate specimens we were able  
789 to ensure extensive sampling of the lower respiratory tract in intubated patients.  
790 However,  
791 we were limited to samples from intubated patients in whom a clinically indicated  
792 bronchoscopy was done to place a percutaneous tracheostomy or for airway clearance.  
793 Although this included a large number of patients with various clinical outcomes, those  
794 sampled may not be representative of the extremes in the spectrum of disease severity  
795 who were most likely not eligible for bronchoscopy. For example, patients that  
796 presented with very rapid clinical deterioration and died within the first few days of  
797 hospitalization or those who were quickly weaned from mechanical ventilation did not

798 receive bronchoscopy. However, extensive and detailed clinical data were also obtained  
799 from intubated COVID-19 patients without bronchoscopy performed within the  
800 Manhattan Campus (no bronchoscopy cohort) and from the Long Island cohort for  
801 whom bronchoscopies were done without collecting research samples. In both of these  
802 cohorts, clinical laboratory culture data did not identify untreated secondary pathogen  
803 infections associated with poor outcome.

804  
805 The samples used in this investigation were obtained during the first surge of cases of  
806 COVID-19 in New York City, and management reflected clinical practices at that time.  
807 Among the differences with current therapeutic approaches in COVID-19 patients,  
808 corticosteroids and remdesivir, two medications that likely affect the lower airway  
809 microbial landscape, were rarely used during the first surge. Other medications, such as  
810 antibiotics and anti-inflammatory drugs could affect our findings and we therefore  
811 considered them as potential confounders. However, the use of these medications was  
812 not found to be associated with clinical outcome. The cross-sectional study design  
813 precluded evaluation of the temporal dynamics of the microbial community or the host  
814 immune response in this cohort, which could provide important insights into the  
815 pathogenesis of this disease. Performing repeated bronchoscopies without a clinical  
816 indication would be challenging in these patients and other less invasive methods might  
817 need to be considered to study the lower airways at earlier timepoints and serially over  
818 time in patients with respiratory failure. It is important to note that there were no  
819 statistically significant differences in the timing of sample collection across the three  
820 outcome groups.

821

822 In summary, we present here the first evaluation of the lower airway microbiome using a  
823 metagenomic and metatranscriptomic approach, along with host immune profiling in  
824 critically ill patients with COVID-19 requiring invasive mechanical ventilation. The RNA  
825 metatranscriptome analysis showed an association between the abundance of SARS-  
826 CoV-2 and mortality, consistent with the signal found when viral load was assessed by  
827 targeted rRT-PCR. These viral signatures correlated with lower anti-SARS-CoV-2 Spike  
828 IgG and host transcriptomic signatures in the lower airways associated with poor  
829 outcome. Importantly, both through culture and NGS data, we did not find evidence for  
830 an association between untreated infections with secondary respiratory pathogens and  
831 mortality. Together, these data suggest that active lower airway SARS-CoV-2  
832 replication and poor SARS-CoV-2-specific antibody responses are the main drivers of  
833 increased mortality in COVID-19 patients requiring mechanical ventilation. The potential  
834 role of oral commensals such as *Mycoplasma salivarium* need to be explored further. It  
835 is possible that *M. salivarium* can impact key immune cells and has recently been  
836 reported at a high prevalence in patients with ventilator-acquired pneumonia<sup>61</sup>. Critically,  
837 our finding that SARS-CoV-2 evades and/or derails effective innate/adaptive immune  
838 responses indicates that therapies aiming to control viral replication or induce a targeted  
839 antiviral immune response may be the most promising approach for hospitalized  
840 patients with SARS-CoV-2 infection requiring invasive mechanical ventilation.

841

842

843 **Methods**

844 **Subjects**

845 Enrolled subjects were 18 years or older, admitted to the intensive care units (ICUs) at  
846 NYU Langone Health from March 10<sup>th</sup> to May 10<sup>th</sup>, 2020 with a nasal swab confirmed  
847 diagnosis of SARS-CoV-2 infection by reverse transcriptase polymerase chain reaction  
848 (RT-PCR) assay and respiratory failure requiring invasive mechanical ventilation.  
849 Samples were obtained during clinically indicated bronchoscopy performed for airway  
850 clearance or for percutaneous tracheostomy placement. Surviving subjects signed  
851 informed consent to participate in this study. Samples and metadata from subjects who  
852 died or were incapacitated were de-identified and included in this study. Comprehensive  
853 demographic and clinical data were collected. We also collected longitudinal data on  
854 clinical laboratory culture results and treatment. **Supplementary figure 1** shows the  
855 distribution of subjects and sampling strategy used for this study. The study protocol  
856 was approved by the Institutional Review Board of New York University.

857

858 **Lower airway bronchoscopic sampling procedure**

859 Both background and supraglottic (buccal) samples were obtained prior to the  
860 procedure, as previously described<sup>62</sup>. The background samples were obtained by  
861 passing sterile saline through the suctioning channel of the bronchoscope prior to the  
862 procedure. Bronchoalveolar lavage (BAL) samples were obtained from one lung  
863 segment as per discretion of the treating physician as clinically indicated. Samples were  
864 then transferred to a BSL3 laboratory for processing. Once there, 2 mL of whole BAL  
865 was stored in a tube prefilled with 2 mL of Zymo Research's DNA/RNA Shield™  
866 (R1100-250, <https://www.zymoresearch.com/pages/covid-19-efforts>) for RNA/DNA

867 preservation and virus inactivation. In addition, background control samples (saline  
868 passed through the bronchoscope prior to bronchoscopy) and supraglottic aspirates  
869 were stored in the same RNA/DNA shield. A subset of samples underwent BAL cell  
870 separation by centrifugation and cells were cryopreserved in DMSO while acellular BAL  
871 fluid was aliquoted for cytokine measurements. A paired blood sample was also  
872 obtained in EDTA tubes (Becton Dickinson, ref# 366450) and PAXgene Blood RNA  
873 tubes (PreAnalytiX) ref# 762165).

874

#### 875 Viral load detection targeting the N gene

876 SARS-CoV-2 viral load was measured by quantitative real-time reverse transcription  
877 polymerase chain reaction (rRT-PCR) targeting the SARS-CoV-2 nucleocapsid (N)  
878 gene and an additional primer/probe set to detect the human RNase P gene (RP).  
879 Assays were performed using Thermo Fisher Scientific (Waltham, MA) TaqPath 1-Step  
880 RT-qPCR Master Mix, CG (catalog number A15299) on the Applied Biosystems (Foster  
881 City, CA) 7500 Fast Dx RealTime PCR Instrument. Using the positive controls provided  
882 by the CDC, which are normalized to 1000 copies/mL, we converted the different Ct  
883 positive to copies/mL. This was done using the DDCT method, applying the formula:  
884  $\text{Power} [2, (\text{CT} (\text{sample}, \text{N1 gene}) - \text{CT} (\text{PC}, \text{N1 gene})) - (\text{CT} (\text{sample}, \text{RP gene}) - \text{CT}$   
885  $(\text{PC}, \text{RP gene}))] * 1000$ .

886

#### 887 SARS-CoV-2 viral viability through measurement of subgenomic transcripts

888 Viral subgenomic mRNA (sgRNA) is transcribed in infected cells and is not packaged  
889 into virions. Thus, presence of sgRNA is indicative of active infection of a mammalian

890 cell in samples. We therefore measure sgRNA in all BAL samples obtained targeting the  
891 E gene as previously described.<sup>21</sup> Briefly, five µl RNA was used in a one-step real-time  
892 RT-PCR assay to sgRNA (forward primer 5'- CGATCTCTTGTAGATCTGTTCTC-3';  
893 reverse primer 5'- ATATTGCAGCAGTACGCACACA-3'; probe 5'-FAM-  
894 AACTAGCCATCCTTACTGCGCTTCG-ZEN-IBHQ-3') and using the Quantifast Probe  
895 RT-PCR kit (Qiagen) according to instructions of the manufacturer. In each run,  
896 standard dilutions of counted RNA standards were run in parallel to calculate copy  
897 numbers in the samples.

898

#### 899 DNA/RNA isolation, library preparation and sequencing

900 DNA and RNA were isolated in parallel using zymoBIOMICS™ DNA/RNA Miniprep Kit  
901 (Cat: R2002) as per manufacturer's instructions. DNA was then used for whole genome  
902 shotgun (WGS) sequencing using it as input into the NexteraXT library preparation kit  
903 following the manufacturer's protocol. Libraries were purified using the Agencourt  
904 AMPure XP beads (Beckman Coulter, Inc.) to remove fragments below 200 bp. The  
905 purified libraries were quantified using the Qubit dsDNA High Sensitivity Assay kit  
906 (Invitrogen) and the average fragment length for each library was determined using a  
907 High Sensitivity D1000 ScreenTape Assay (Agilent). Samples were added in an  
908 equimolar manner to form two sequencing pools. The sequencing pools were quantified  
909 using the KAPA Library Quantification Kit for Illumina platforms. The pools were then  
910 sequenced on the Illumina Novaseq 6000 in one single run. For RNA sequencing, RNA  
911 quantity and integrity were tested with a BioAnalyzer 2100 (Agilent). Among  
912 bronchoscope control (BKG) samples, only 5 yielded RNA with sufficient quality and  
913 quantity to undergo library preparation and sequencing. The automated Nugen Ovation



914 Trio Low Input RNA method was used for library prep with 3ng total RNA input of each  
915 sample. After 6 amplification cycles, samples were sequenced using 2x Novaseq 6000  
916 S4 200 cycle Flowcells using PE100 sequencing.

917

918 Microbial community characterization using whole genome shotgun sequencing (WGS)  
919 and RNA metatranscriptome

920 For all metagenomic and metatranscriptomic reads, Trimmomatic v0.36<sup>82</sup>, with leading  
921 and trailing values set to 3 and minimum length set to 36, was used to remove adaptor  
922 sequences. All rRNA reads were then removed from the metatranscriptomic reads using  
923 SortMeRNA v4.2.0<sup>83</sup> with default settings. Metagenomic and filtered metatranscriptomic  
924 reads were mapped to the human genome using Bowtie2 v2.3.4.1<sup>84</sup> with default settings  
925 and all mapping reads were excluded from subsequent microbiome, mycobiome, and  
926 virome metagenomic and metatranscriptomic analysis. Technical replicates for each  
927 biological sample were pooled together for subsequent analyses. Taxonomic profiles for  
928 all metagenomic and metatranscriptomic samples were generated using Kraken  
929 v2.0.7<sup>85</sup> and Bracken v2.5 [<https://doi.org/10.7717/peerj-cs.104>] run with default  
930 settings. The database used for quantifying taxonomic profiles was generated using a  
931 combined database containing human, bacterial, fungal, archaeal, and viral genomes  
932 downloaded from NCBI RefSeq on January 8, 2021. Additionally, genomes for *Candida*  
933 *auris* (Genbank: GCA\_003013715.2, GCA\_008275145.1) and *Pneumocystis jirovecii*  
934 (Genbank: GCA\_001477535.1) were manually added to the database. Differentially  
935 abundant bacterial and viral taxa were identified for the BAL and UA samples groups  
936 individually using DESeq2 v1.28.1<sup>86</sup> with the three group clinical outcome meta-data  
937 readouts set as the sample groupings. Significantly differentially abundant taxa

938 contained at a minimum an aggregate of 5 reads across samples and had an FDR  
939  $<0.2^{87,88}$ .

940  
941 For functional microbial profiling, processed sequencing reads were further depleted of  
942 human-mapping reads by removing all reads classified as human by Kraken v2.0.7<sup>85</sup>  
943 using KrakenTools v0.1-alpha (<https://github.com/jenniferlu717/KrakenTools>). FMAP  
944 v0.15<sup>89</sup> was run on both the metagenomic and metatranscriptomic reads to profile the  
945 metabolic pathways present in each sample. FMAP\_mapping.pl paired with diamond  
946 v0.9.24<sup>90</sup> and FMAP\_quantification.pl were used with default settings to identify and  
947 quantify proteins in the Uniref90 database. Using DESeq2 v1.28.1<sup>86</sup>, differentially  
948 expressed genes were identified for the BAL samples individually using the three group  
949 clinical outcome-metadata readouts for all genes that had an aggregate 5 reads across  
950 all samples.

951  
952 Antibiotic resistance genes were quantified in all metagenome and metatranscriptome  
953 samples using Salmon v1.3.0<sup>91</sup> run with --keepDuplicates for indexing and --libtype A --  
954 allowDovetail --meta for quantification. Genes were filtered such that only genes that  
955 actively conferred antibiotic resistance were kept. To assess differentially expressed  
956 classes of antibiotic resistance genes, gene counts for individual antibiotic resistance  
957 genes were collapsed by their conferred antibiotic resistance.

958  
959 **Supplementary Figure 1** shows a summary of depth achieved with the parallel WGS  
960 and metatranscriptome approach across sample types and the number of reads  
961 assigned to different microbial subfractions (bacteria, fungi, DNA viruses, RNA viruses

962 and phages). Further analysis was also done to identify possible contaminants in the  
963 metatranscriptome and metagenome datasets. To this end, we compared the relative  
964 abundance of taxa between background bronchoscope control and BAL samples. Taxa  
965 with median relative abundance greater in background than in BAL were identified as  
966 probably contaminant and listed in **Supplementary Table 4**). None of the taxa identified  
967 as possible contaminants were removed from the analyzed data but are shown for  
968 comparison with signatures identified in the rest of the analyses.

969

970

#### 971 *Anti-Spike SARS-CoV-2 antibody profiling in BAL*

972 BAL samples were heat-treated at 56°C for one hour, and centrifuged at 14000g for 5  
973 min. The supernatant was collected and diluted 50-fold in PBST containing 1% skim  
974 milk. The diluted samples were incubated at room temperature (R.T.) for 30 min with  
975 QBeads DevScreen: SAv (Streptavidin) (Sartorius 90792) that had been loaded with  
976 biotinylated Spike, biotinylated RBD or biotin (negative control) in wells of a 96 well HTS  
977 filter plate (MSHVN4550). As positive controls, we used CR3022 antibody, that  
978 recognizes SARS-CoV-2 Spike and RBD, in human IgG, IgA and IgM formats (Absolute  
979 Antibody). After washing the beads, bound antibodies were labeled with anti IgG-  
980 DyLight488, anti IgA-PE and anti IgM-PECy7, and the fluorescence intensities were  
981 measured in Intellicyt IQue3 (Sartorius). The acquired data [median fluorescence  
982 intensity (MFI)] were normalized using the MFI values of the CR3022 antibodies to  
983 compensate for variations across plates. **Supplementary Figure 10** shows that the  
984 levels of these antibodies were higher in BAL samples of patients with SARS-CoV-2  
985 than in BAL samples from 10 uninfected healthy smokers recruited for research

986 bronchoscopy. Details of method development and validation will be described  
987 elsewhere (Koide et al. in preparation).

988

989 *SARS-CoV-2 preparation and neutralization assay*

990 icSARS-CoV-2-mNG (isolate USAWA/1/2020, obtained from the UTMB World  
991 Reference Center for Emerging Viruses and Arboviruses) was amplified once in Vero E6  
992 cells (P1 from the original stock). Briefly, 90-95% confluent T175 flask (Thomas  
993 Scientific) of Vero E6 ( $1 \times 10^7$  cells) was inoculated with 50  $\mu$ L of icSARS-CoV-2-mNG in  
994 5 mL of infection media (DMEM, 2% FBS, 1% NEAA, and 10 mM HEPES) for 1 hour.  
995 After 1 hour, 20 mL of infection media was added to the inoculum and cells were  
996 incubated 72 hours at 37 °C and 5% CO<sub>2</sub>. After 72 hours, the supernatant was collected  
997 and the monolayer was frozen and thawed once. Both supernatant and cellular fractions  
998 were combined, centrifuged for 5 min at 1200 rpm, and filtered using a 0.22  $\mu$ m Steriflip  
999 (Millipore). Viral titers were determined by plaque assay in Vero E6 cells. In brief,  
1000 220,000 Vero E6 cells/well were seeded in a 24 well plate, 24 hours before inoculation.  
1001 Ten-fold dilutions of the virus in DMEM (Corning) were added to the Vero E6  
1002 monolayers for 1 hour at 37 °C. Following incubation, cells were overlaid with 0.8%  
1003 agarose in DMEM containing 2% FBS (Atlanta biologicals) and incubated at 37 °C for  
1004 72 h. The cells were fixed with 10% formalin, the agarose plug removed, and plaques  
1005 visualized by crystal violet staining. All procedures including icSARS-CoV-2-mNG virus  
1006 were performed using Biosafety Level 3 laboratory conditions.

1007

1008 For SARS-CoV-2 neutralization assays, Vero E6 cells (30,000 cells/well) were seeded  
1009 in a 96 well plate 24 h before infection. Two-fold serial dilutions of BAL lysates were

1010 mixed with mixed 1:1 (vol/vol) with SARS-CoV-2 mNG virus (multiplicity of infection,  
1011 MOI 0.5), and incubated for 1 h at 37 °C. After incubation, 100 µL of the mixtures of the  
1012 antibody and SARS-CoV-2 mNG were added to the Vero E6 monolayers, and cells  
1013 were incubated at 37°C. After 20 h, cells were fixed with 4 % formaldehyde (Electron  
1014 Microscopy Sciences) at room temperature for 1 h. After fixation, cells were washed  
1015 twice with PBS and permeabilized with 0.25% triton-100, stained with DAPI (Thermo),  
1016 and quantified on a CellInsight CX7 High-content microscope (Thermo) using a cut-off  
1017 for three standard deviations from negative to be scored as an infected cell.

1018

### 1019 Transcriptome of BAL cells

1020 RNA-Seq was performed on bronchial epithelial cells obtained by airway brushing, as  
1021 described<sup>92-94</sup>, using the Hi-seq/Illumina platform at the NYU Langone Genomic  
1022 Technology Center (data available at Sequence Read Archive: # PRJNA592149).  
1023 KEGG<sup>95,96</sup> annotation was summarized at levels 1 to 3. Genes with an FDR-corrected  
1024 adjusted p-value <0.25 were considered significantly differentiated, unless otherwise  
1025 specified. Pathway analysis using differentially regulated genes (FDR<0.25) was done  
1026 using Ingenuity Pathway Analysis, RRID:SCR\_0- at least 1 count per million in at least  
1027 two samples were retained. For digital cytometry with CIBERSORTx, a signature matrix  
1028 derived from single-cell transcriptome of BAL cells collected from patients with COVID-  
1029 19<sup>31</sup> was first generated with the “Create Signature Matrix” module in the CIBERSORTx  
1030 online tool. A maximum of 10 cells per cell type per patient were initially sampled from  
1031 the original data and 20 cells per cell type were then used to build the single-cell  
1032 reference with the default parameters. Then the “Impute Cell Fractions” module was  
1033 used to estimate the absolute cell fraction score of different cell types in bulk

1034 transcriptomes using the single-cell signatures with “S-mode” batch correction and 100  
1035 permutations in the absolute mode. Bulk transcriptomes with a significant deconvolution  
1036 p-value ( $\leq 0.05$ ) were retained. For xCell cell type signature enrichment analysis, the  
1037 enrichment scores were inferred with built-in signature of cell types detected in the BAL  
1038 samples as reported previously<sup>31</sup>. The two-tailed Wilcoxon rank sum test with  
1039 Benjamini-Hochberg correction were computed between groups of samples for  
1040 comparison.

1041

#### 1042 Microbial and Host predictive modeling

1043 Cox proportional hazards model was used for investigating the association between the  
1044 time to death and the relative abundance of each taxon quantified using  
1045 metatranscriptomic and metagenomic data separately. We first performed the univariate  
1046 screening test to identify significant features associated with the time to death using the  
1047 Cox proportion hazards regression model for the relative abundance of taxa from the  
1048 RNA and DNA data, and log-transformed count of host transcriptome data, respectively.  
1049 Within each type of data, given the p-value cutoff, the features with a p-value less than  
1050 the cutoff were selected and integrated as a sub-community. For the RNA and DNA  
1051 data, the alpha diversity (Shannon index) was calculated for each sample on the  
1052 selected sub-community and the negative of the value was defined as the microbial risk  
1053 score, because high alpha diversity indicates low risk of death. For the host  
1054 transcriptome data, the log-transformed total count of all selected candidate  
1055 transcriptome for each sample was defined as the risk score, since most selected  
1056 candidate transcriptomes increased the risk of death. The leave-one-out cross-  
1057 validation (LOOCV) was used for the predictions. The p value cutoff was set at the

1058 value which produces the largest AUC (area under the receiver operating characteristic  
1059 curve) in predicting the death/survival status using the risk score we constructed over  
1060 these features. The additive model was used to integrate when more than one scores  
1061 are used for the prediction.

1062

### 1063 *Multiscale and co-expression network analyses*

1064 Raw counts from the human transcriptome were normalized and converted to log2-  
1065 counts per million using limma<sup>97</sup>/voom<sup>98</sup> (v3.44.1 with R v4.0.0) with standard  
1066 parameters. Microbiome abundance information was converted to relative abundance.  
1067 Low abundance taxa were removed based on average abundance across all samples to  
1068 yield a minimum of 1000 taxa for each metatranscriptome dataset. All datasets were  
1069 batch adjusted. Differentially expressed genes (DEGs) and differentially abundant taxa  
1070 were called using the DESeq2 package<sup>86</sup> (v1.28.1), based on the negative binomial (i.e.  
1071 Gamma-Poisson) distribution. According to the recommendation by the authors, we  
1072 used non-normalized data (i.e. raw gene counts and abundance data), as DESeq2  
1073 internally corrects data and performs normalization steps. For this purpose, raw  
1074 microbiome abundance data were converted to DESeq2 dds objects using the phyloseq  
1075 R library (V1.32.0). Contrasts are based on outcome groups ( $\leq$  28 days MV,  $>$  28 days  
1076 MV or death). Differentially expressed genes and differentially abundant tax with FDR of  
1077 0.2 or less are considered significant.

1078 Multiscale Embedded Gene Co-Expression Network Analysis (MEGENA)<sup>32</sup> was  
1079 performed to identify host modules of highly co-expressed genes in SARS-CoV-2  
1080 infection. The MEGENA workflow comprises four major steps: 1) Fast Planar Filtered  
1081 Network construction (FPFNC), 2) Multiscale Clustering Analysis (MCA), 3) Multiscale



1082 Hub Analysis (MHA), 4) and Cluster-Trait Association Analysis (CTA). The total  
1083 relevance of each module to SARS-CoV-2 infection was calculated by using the Product  
1084 of Rank method with the combined enrichment of the differentially expressed gene  
1085 (DEG) signatures as implemented:  $G_j = \prod_i g_{ji}$ , where,  $g_{ji}$  is the relevance of a  
1086 consensus  $j$  to a signature  $i$ ; and  $g_{ji}$  is defined as  $(\max_j(r_{ji}) + 1 - r_{ji}) / \sum_j r_{ji}$ , where  $r_{ji}$   
1087 is the ranking order of the significance level of the overlap between the module  $j$  and the  
1088 signature.

1089  
1090 To functionally annotate gene signatures and gene modules derived from the host  
1091 transcriptome data, we performed an enrichment analysis of the established pathways  
1092 and signatures—including the gene ontology (GO) categories and MSigDB. The hub  
1093 genes in each subnetwork were identified using the adopted Fisher's inverse Chi-  
1094 square approach in MEGENA; Bonferroni-corrected p-values smaller than 0.05 were set  
1095 as the threshold to identify significant hubs. The correlation between modules, modules  
1096 and clinical traits as well as modules and individual taxa were performed using  
1097 Spearman correlation. Other correlation measures, such as Pearson correlation or the  
1098 Maximal Information Coefficient (MIC)<sup>99</sup> proved to be inferior for this task. Categorical  
1099 trait data was converted to numerical values as suitable.

1100

#### 1101 Data availability

1102 Sequencing data are available in NCBI's Sequence Read Archive under project  
1103 numbers PRJNA688510 and PRJNA687506 (RNA and DNA sequencing, respectively).  
1104 Codes used for the analyses presented in the current manuscript are available at  
1105 [https://github.com/segalmicrobiomelab/SARS\\_CoV2](https://github.com/segalmicrobiomelab/SARS_CoV2).



1107 **Figure Legends:**

1108

1109 **Figure 1. Associations between culture positivity and clinical outcome.** Odds  
1110 ratios and corresponding 95% confidence intervals for rates of culture positivity for the  
1111 whole cohort (n=589) during the length of their hospitalization (left) and during the first 2  
1112 weeks of hospitalization (right).

1113

1114 **Figure 2. SARS-CoV-2 viral load and virus metatranscriptome analyses.** Copies of  
1115 the SARS-CoV-2 N gene per ml, normalized by the Human RNase P gene, comparing  
1116 paired upper and lower airway samples **(a)** and levels in BAL comparing clinical  
1117 outcome groups **(b)**, \*= Mann–Whitney U  $p < 0.05$ , \*\*= Mann–Whitney U  $p < 0.01$ ). **(c)**  
1118 PCoA analysis based on Bray Curtis Dissimilarity index of BAL Metatranscriptome data  
1119 comparing clinical outcome (PERMANOVA p-value). Bubble plot showing DESeq  
1120 results of RNA viruses **(d)** and expressed DNA phages **(e)** enriched in each clinical  
1121 outcome comparisons (bubble size based on median relative abundance for those  
1122 found statistically significant).

1123

1124 **Figure 3. Bacteria load and taxonomic compositional analyses.** **(a)** Bacterial load  
1125 measured by ddPCR targeting 16S rRNA gene (\*\*= Mann–Whitney U  $p < 0.01$ ). PCoA  
1126 analysis based on Bray Curtis Dissimilarity index of BAL Metagenome **(b)** and  
1127 Metatranscriptome **(c)** data comparing clinical outcome (PERMANOVA p-value). **(d)**  
1128 Gene Set Enrichment Analysis (GSEA) was used to compare the taxonomic signatures  
1129 identified in BAL metagenome (diamonds) and metatranscriptome (circles) as distinctly  
1130 enriched for comparisons between clinical outcome groups (differential enrichment

1131 performed based on DESeq2 analysis). **(e)** Bubble plot showing DESeq results of  
1132 bacteria found concordantly differentially enriched between clinical outcome groups  
1133 (bubble size based on median relative abundance for those found statistically  
1134 significant).

1135  
1136 **Figure 4. Functional microbial compositional analyses.** KOs were summarized to  
1137 associated pathways and differential expression was calculated based on DESeq2  
1138 analysis. **(a)** Gene Set Enrichment Analysis (GSEA) was used to compare the functional  
1139 signatures identified in BAL metagenome and metatranscriptome as distinctly enriched  
1140 for comparisons between clinical outcome groups. **(b)** Bubble plot showing DESeq  
1141 results of microbial functions found concordantly differentially enriched between clinical  
1142 outcome groups (bubble size based on median relative abundance for those found  
1143 statistically significant).

1144  
1145 **Figure 5. Lower airway host immune profiling in severely ill COVID-19.** **(a)** Levels  
1146 of anti-SARS-CoV-2 Spike antibodies in BAL (\*= Mann–Whitney U  $p < 0.05$ ). **(b)** Heat-  
1147 map of canonical pathway analysis based on Ingenuity Pathway Analysis (IPA,  
1148 RRID:SCR\_008653) using the lower airway host transcriptome comparing clinical  
1149 outcome groups. Orange shows up-regulation of pathway, blue shows down-regulation  
1150 of pathway. **(c)** Cell type abundance quantification plots. Comparison of abundance of  
1151 mast cells and neutrophils among outcome groups in the BAL fluids of critically ill  
1152 patients with COVID-19. Cell type abundance was estimated from the host  
1153 transcriptome with CIBERSORTx. Each dot denotes the quantification score of a  
1154 sample and boxes depict median and inter-quartile range (\*= Mann–Whitney U  $p < 0.05$ ).

1155

1156 **Figure 6. Mortality predictive power of metatranscriptome, metagenome and host**  
1157 **transcriptome. (a)** Area under the curved median and confidence interval for receiver  
1158 operating characteristic curve analyses calculated from each sequencing datasets as  
1159 predictor and mortality as outcome. **(b)** Kaplan-meier survival analyses based on a  
1160 cutoff value estimated from features selected from each sequencing dataset. The “High  
1161 risk” and “Low risk” groups is the mean of predicted risk scores in all samples. **(c)**  
1162 Scatterplot among risk scores from metatranscriptome, metagenome, and host  
1163 transcriptome. Dotted line denotes the mean of the risk scores across all subjects,  
1164 which is also the threshold for dividing the samples into “High risk” and “Low risk”  
1165 groups. **(d)** IPA analyses of host transcriptomic signatures identified as most predictive  
1166 of mortality.

1167

1168

1169

1170 **Supplementary Figure Legends:**

1171

1172 **Supplementary Figure 1. Description of patient cohort, samples obtained,**  
1173 **analyses performed and sequencing depth.**

1174

1175 **Supplementary Figure 2. SARS-CoV-2 viral load in upper airway samples.** Copies  
1176 of the SARS-CoV-2 N gene per ml, normalized by the Human RNase P gene, in upper  
1177 airways comparing clinical outcome groups (Mann–Whitney U p-value).

1178

1179 **Supplementary Figure 3. Identification of top taxa found in background samples**  
1180 **as compared with BAL and upper airway samples.** Boxplots showing the relative  
1181 abundance values in log<sub>10</sub> relative abundance of taxa ranked ordered based on  
1182 dominance of Background bronchoscope control samples and compared to abundances  
1183 in BAL and Upper Airway samples within metatranscriptome **(a)** and metagenome **(b)**  
1184 data. Red labels indicate taxa where relative abundance is higher in background  
1185 samples than in BAL and therefore considered possible contaminant.

1186

1187 **Supplementary Figure 4. Topographical analyses of Metatranscriptome data.**  
1188 Comparison of alpha diversity (Shannon Index, **a**) and beta diversity (Bray Curtis  
1189 Dissimilarity index, **b**) across background negative controls (bronchoscope),  
1190 bronchoalveolar lavage (BAL) and upper airway (UA) samples (Kruskal-Wallis and  
1191 PERMANOVA p-values, respectively). **(c)** Boxplots showing the relative abundance  
1192 values in log<sub>10</sub> across all metatranscriptome samples for the BAL and Upper Airway  
1193 samples. The 50 taxa with the highest relative abundance values in the BAL  
1194 metatranscriptome data are displayed; the top 10 in the BAL are highlighted in bold.

1195 Each column consists of four plots displaying in order from top to bottom, the most  
1196 abundant RNA vertebrate viruses, DNA phages, bacteria, and fungi identified (from top  
1197 to bottom). Numbers in parentheses next to the taxa labels display the ranking in  
1198 relative abundance for either the BAL or UA metatranscriptome samples, respectively.

1199

1200 **Supplementary Figure 5. Topographical analyses of Metagenome Data.**

1201 Comparison of alpha diversity (Shannon Index, **a**) and beta diversity (Bray Curtis  
1202 Dissimilarity index, **b**) across background negative controls (bronchoscope),  
1203 bronchoalveolar lavage (BAL) and upper airway (UA) samples (Kruskal-Wallis and  
1204 PERMANOVA p-values, respectively). (c) Boxplots showing the relative abundance  
1205 values in log<sub>10</sub> across all metagenome samples for the BAL and Upper Airways. The 50  
1206 taxa with the highest relative abundance values in the BAL metagenome are displayed;  
1207 the top 10 in the BAL are highlighted in bold. Each column consists of two plots  
1208 displaying the most abundant bacteria and fungi identified. Numbers in parentheses  
1209 next to the taxa labels displays its ranking in relative abundance for either the BAL or  
1210 UA metagenome samples, respectively.

1211

1212 **Supplementary Figure 6. Evaluation of associations between the lower airway**

1213 **RNA virome and clinical outcome.** Comparisons between the three clinical outcome  
1214 groups was performed for  $\alpha$  diversity (Shannon Index, Kruskal-Wallis p-value, left  
1215 panel),  $\beta$  diversity (based on Bray Curtis Dissimilarity Index, PERMANOVA p-value,  
1216 right panel).

1217



1218 **Supplementary Figure 7. Topographical analyses of the bacterial load.** Bacterial  
1219 load measured by ddPCR targeting 16S rRNA gene in background bronchoscope  
1220 controls (BKG), lower airway (BAL) and upper airway (UA) samples.

1221  
1222 **Supplementary Figure 8. Evaluation of associations between the lower airway  
1223 mycobiome and clinical outcome.** Fungal taxonomic data was subtracted from  
1224 metagenome and metatranscriptome data from lower airway samples. **(a)** Comparisons  
1225 between the three clinical outcome groups was performed for  $\alpha$  diversity (Shannon  
1226 Index, Kruskal-Wallis p-value, left panel),  $\beta$  diversity (based on Bray Curtis Dissimilarity  
1227 Index, PERMANOVA p-value, right panel) on metagenome data. **(b)** Bubble plot  
1228 showing DESeq results of fungi enriched in each clinical outcome comparisons based  
1229 on metagenome data (bubble size based on median relative abundance for those found  
1230 statistically significant). **(c)** Comparisons between the three clinical outcome groups was  
1231 performed for  $\alpha$  diversity (Shannon Index, Kruskal-Wallis p-value, left panel),  $\beta$  diversity  
1232 (based on Bray Curtis Dissimilarity Index, PERMANOVA p-value, right panel) on  
1233 metatranscriptome data. **(d)** Bubble plot showing DESeq results of fungi enriched in  
1234 each clinical outcome comparisons based on metatranscriptome data (bubble size  
1235 based on median relative abundance for those found statistically significant).

1236  
1237 **Supplementary Figure 9. Evaluation of associations between the lower airway  
1238 antibiotic resistance genes and clinical outcome.** Bubble plot showing DESeq  
1239 results of summarized categories of antibiotic resistant microbial genes taken from  
1240 MEGARes for the metagenome (top) and metatranscriptome (bottom) data sets for  
1241 each clinical outcome comparison (bubble size based on median relative abundance for

1242 those found to be statistically significant). Colored bubbles indicate significantly  
1243 enriched antibiotic resistance groups.

1244

1245 **Supplementary Figure 10. Measurement of anti-SARS-CoV-2 Immunoglobulin**  
1246 **levels and neutralization activity.** Levels of anti-SARS-CoV-2 Spike **(a)** and anti-  
1247 SARS-CoV-2 receptor binding domain (RBD, **b**) antibodies in BAL from non SARS-  
1248 CoV-2 infected smoker controls and severely ill COVID-19 intubated patients. Note that  
1249 the signals for different isotypes cannot be compared because they are detected with  
1250 different reagents. **(c)** Comparisons of levels of anti-SARS-CoV-2 RBD antibodies in  
1251 BAL across subjects in different clinical outcome groups (\*= Mann–Whitney U  $p < 0.05$ ).  
1252 **(d)** Neutralizing activity in BAL samples across subjects in different clinical outcome  
1253 groups.

1254

1255 **Supplementary Figure 11. Evaluation for associations between the lower airway**  
1256 **host transcriptome and clinical outcome.** **(a)** PCoA (based on Bray Curtis  
1257 Dissimilarity Index, PERMANOVA p-value) comparing the three clinical outcome  
1258 groups. (b, c, d) Volcano plot comparing lower airway host transcriptome between the  
1259 three clinical outcome groups.

1260

1261 **Supplementary Figure 12. Multi-scale cross-kingdom and co-expression**  
1262 **networks.** **(a)** The neighborhood 5 cross-kingdom metatranscriptome network centered  
1263 around SARS-CoV-2 is shown. Nodes refer to taxa, edges denote co-abundance after  
1264 MEGENA. The size of the nodes indicates abundance. Taxa with large nodes are highly  
1265 abundant. Node-shapes are according to the legend and refer to different microbial

1266 kingdoms. The differential abundance of taxa in  $\log_2(\text{fold change})$  between the  
1267 deceased group and the  $\leq 28$ -day MV groups is shown by node color - red nodes are  
1268 taxa abundant in the deceased group compared to the  $\leq 28$ -day MV group, blue colored  
1269 nodes denote the opposite. **(b)** Modules M175 and M718 of the host transcriptome are  
1270 shown. The node size refers to the absolute gene expression value. Nodes with wide  
1271 node border refer to key regulators/hub genes (see Methods). The differential gene  
1272 expression of taxa in  $\log_2(\text{fold change})$  between the deceased group and the  $\leq 28$ -day  
1273 MV groups is shown by node color - red nodes are up-regulated in the deceased group  
1274 compared to the  $\leq 28$ -day MV group, blue colored nodes denote the opposite.

1275

1276 **Reference:**

- 1277 1. The, L. Emerging understandings of 2019-nCoV. *Lancet* **395**, 311 (2020).
- 1278 2. WHO coronavirus disease (COVID-19) dashboard. Geneva: World Health Organization, Available  
1279 online: <https://covid19.who.int/> (2020).
- 1280 3. Rabaan, A.A., et al. SARS-CoV-2, SARS-CoV, and MERS-COV: A comparative overview. *Infez Med*  
1281 **28**, 174-184 (2020).
- 1282 4. Cao, X. COVID-19: immunopathology and its implications for therapy. *Nat Rev Immunol* **20**, 269-  
1283 270 (2020).
- 1284 5. Arentz, M., et al. Characteristics and Outcomes of 21 Critically Ill Patients With COVID-19 in  
1285 Washington State. *JAMA* **323**, 1612-1614 (2020).
- 1286 6. Bhatraju, P.K., et al. Covid-19 in Critically Ill Patients in the Seattle Region - Case Series. *N Engl J*  
1287 *Med* **382**, 2012-2022 (2020).
- 1288 7. Cummings, M.J., et al. Epidemiology, clinical course, and outcomes of critically ill adults with  
1289 COVID-19 in New York City: a prospective cohort study. *The Lancet* **395**, 1763-1770 (2020).
- 1290 8. European Society of Anesthesiology. Analysis of COVID-19 data on numbers in intensive care  
1291 from Italy: European Society of Anaesthesiology (ESA). Vol. 2020 (2020).
- 1292 9. Grasselli, G., et al. Baseline Characteristics and Outcomes of 1591 Patients Infected With SARS-  
1293 CoV-2 Admitted to ICUs of the Lombardy Region, Italy. *JAMA* **323**, 1574-1581 (2020).
- 1294 10. Intensive Care National Audit and Research Center UK. ICNARC report on COVID-19 in Critical  
1295 Care., Vol. 2020 (2020).
- 1296 11. Richardson, S., et al. Presenting Characteristics, Comorbidities, and Outcomes Among 5700  
1297 Patients Hospitalized With COVID-19 in the New York City Area. *JAMA* **323**, 2052-2059 (2020).
- 1298 12. Yang, X., et al. Clinical course and outcomes of critically ill patients with SARS-CoV-2 pneumonia  
1299 in Wuhan, China: a single-centered, retrospective, observational study. *Lancet Respir Med* **8**,  
1300 475-481 (2020).
- 1301 13. Morens, D.M. & Fauci, A.S. The 1918 influenza pandemic: insights for the 21st century. *J Infect*  
1302 *Dis* **195**, 1018-1028 (2007).
- 1303 14. Shieh, W.J., et al. 2009 pandemic influenza A (H1N1): pathology and pathogenesis of 100 fatal  
1304 cases in the United States. *Am J Pathol* **177**, 166-175 (2010).
- 1305 15. Dickson, R.P., et al. Enrichment of the lung microbiome with gut bacteria in sepsis and the acute  
1306 respiratory distress syndrome. *Nat Microbiol* **1**, 16113 (2016).
- 1307 16. Kitsios, G.D., et al. Respiratory Tract Dysbiosis Is Associated with Worse Outcomes in  
1308 Mechanically Ventilated Patients. *Am J Respir Crit Care Med* **202**, 1666-1677 (2020).
- 1309 17. Dickson, R.P., et al. Lung Microbiota Predict Clinical Outcomes in Critically Ill Patients. *Am J*  
1310 *Respir Crit Care Med* **201**, 555-563 (2020).
- 1311 18. Zuo, T., et al. Alterations in Fecal Fungal Microbiome of Patients With COVID-19 During Time of  
1312 Hospitalization until Discharge. *Gastroenterology* **159**, 1302-1310 e1305 (2020).
- 1313 19. Chen, L., et al. RNA based mNGS approach identifies a novel human coronavirus from two  
1314 individual pneumonia cases in 2019 Wuhan outbreak. *Emerg Microbes Infect* **9**, 313-319 (2020).
- 1315 20. Shen, Z., et al. Genomic Diversity of Severe Acute Respiratory Syndrome-Coronavirus 2 in  
1316 Patients With Coronavirus Disease 2019. *Clin Infect Dis* **71**, 713-720 (2020).
- 1317 21. Wolfel, R., et al. Virological assessment of hospitalized patients with COVID-2019. *Nature* **581**,  
1318 465-469 (2020).
- 1319 22. Yazdi, M., Bouzari, M. & Ghaemi, E.A. Genomic analyses of a novel bacteriophage (VB\_PmiS-  
1320 Isfahan) within Siphoviridae family infecting *Proteus mirabilis*. *Genomics* **111**, 1283-1291 (2019).
- 1321 23. Budayeva, H.G., Rowland, E.A. & Cristea, I.M. Intricate Roles of Mammalian Sirtuins in Defense  
1322 against Viral Pathogens. *J Virol* **90**, 5-8 (2016).

- 1323 24. Dar, H.H., *et al.* Pseudomonas aeruginosa utilizes host polyunsaturated  
1324 phosphatidylethanolamines to trigger theft-ferroptosis in bronchial epithelium. *J Clin Invest* **128**,  
1325 4639-4653 (2018).
- 1326 25. Stoyanovsky, D.A., *et al.* Iron catalysis of lipid peroxidation in ferroptosis: Regulated enzymatic  
1327 or random free radical reaction? *Free Radic Biol Med* **133**, 153-161 (2019).
- 1328 26. Burtscher, J., Cappellano, G., Omori, A., Koshiba, T. & Millet, G.P. Mitochondria: In the Cross Fire  
1329 of SARS-CoV-2 and Immunity. *iScience* **23**, 101631 (2020).
- 1330 27. Smati, S., *et al.* Relationship between obesity and severe COVID-19 outcomes in patients with  
1331 type 2 diabetes: Results from the CORONADO study. *Diabetes Obes Metab* (2020).
- 1332 28. Wargny, M., *et al.* Type 1 Diabetes in People Hospitalized for COVID-19: New Insights From the  
1333 CORONADO Study. *Diabetes Care* **43**, e174-e177 (2020).
- 1334 29. Newman, A.M., *et al.* Determining cell type abundance and expression from bulk tissues with  
1335 digital cytometry. *Nature Biotechnology* **37**, 773-782 (2019).
- 1336 30. Aran, D., Hu, Z. & Butte, A.J. xCell: digitally portraying the tissue cellular heterogeneity  
1337 landscape. *Genome Biology* **18**, 220 (2017).
- 1338 31. Liao, M., *et al.* Single-cell landscape of bronchoalveolar immune cells in patients with COVID-19.  
1339 *Nature Medicine* **26**, 842-844 (2020).
- 1340 32. Song, W.M. & Zhang, B. Multiscale Embedded Gene Co-expression Network Analysis. *PLoS*  
1341 *computational biology* **11**, e1004574 (2015).
- 1342 33. Praest, P., *et al.* The influence of TAP1 and TAP2 gene polymorphisms on TAP function and its  
1343 inhibition by viral immune evasion proteins. *Molecular immunology* **101**, 55-64 (2018).
- 1344 34. Sreekumar, P.G., *et al.* The mitochondrial-derived peptide humanin protects RPE cells from  
1345 oxidative stress, senescence, and mitochondrial dysfunction. *Investigative ophthalmology &*  
1346 *visual science* **57**, 1238-1253 (2016).
- 1347 35. Zhou, J.y., *et al.* Wnt/ $\beta$ -catenin-mediated heat exposure inhibits intestinal epithelial cell  
1348 proliferation and stem cell expansion through endoplasmic reticulum stress. *Journal of cellular*  
1349 *physiology* **235**, 5613-5627 (2020).
- 1350 36. Liu, W., *et al.* LncRNA Malat1 inhibition of TDP43 cleavage suppresses IRF3-initiated antiviral  
1351 innate immunity. *Proceedings of the National Academy of Sciences* **117**, 23695-23706 (2020).
- 1352 37. American Association of Otolaryngology-Head and Neck Surgery. Tracheotomy  
1353 Recommendations During the Covid-19 Pandemic. Vol. 2020 (2020).
- 1354 38. Sommer, D.D., *et al.* Recommendations from the CSO-HNS taskforce on performance of  
1355 tracheotomy during the COVID-19 pandemic. *J Otolaryngol Head Neck Surg* **49**, 23 (2020).
- 1356 39. Shiba, T., Ghazizadeh, S., Chhetri, D., St John, M. & Long, J. Tracheostomy Considerations during  
1357 the COVID-19 Pandemic. *OTO Open* **4**, 2473974X20922528 (2020).
- 1358 40. Ear Nose and Throat Surgery United Kingdom. Tracheostomy guidance during the COVID-19  
1359 Pandemic. Vol. 2020 (2020).
- 1360 41. Michetti, C.P., Burlew, C.C., Bulger, E.M., Davis, K.A. & Spain, D.A. Performing tracheostomy  
1361 during the Covid-19 pandemic: guidance and recommendations from the Critical Care and Acute  
1362 Care Surgery Committees of the American Association for the Surgery of Trauma. *Trauma*  
1363 *Surgery & Acute Care Open* **5**, e000482 (2020).
- 1364 42. McGrath, B.A., *et al.* Tracheostomy in the COVID-19 era: global and multidisciplinary guidance.  
1365 *Lancet Respir Med*, S2213-2600(2220)30230-30237 (2020).
- 1366 43. Kelleni, M.T. SARS CoV-2 viral load might not be the right predictor of COVID-19 mortality. *J*  
1367 *Infect* (2020).
- 1368 44. Fajnzylber, J., *et al.* SARS-CoV-2 viral load is associated with increased disease severity and  
1369 mortality. *Nat Commun* **11**, 5493 (2020).
- 1370 45. Bitker, L., *et al.* Protracted viral shedding and viral load are associated with ICU mortality in  
1371 Covid-19 patients with acute respiratory failure. *Ann Intensive Care* **10**, 167 (2020).

- 1372 46. Magleby, R., *et al.* Impact of SARS-CoV-2 Viral Load on Risk of Intubation and Mortality Among  
1373 Hospitalized Patients with Coronavirus Disease 2019. *Clin Infect Dis* (2020).
- 1374 47. Westblade, L.F., *et al.* SARS-CoV-2 Viral Load Predicts Mortality in Patients with and without  
1375 Cancer Who Are Hospitalized with COVID-19. *Cancer Cell* **38**, 661-671 e662 (2020).
- 1376 48. Pujadas, E., *et al.* SARS-CoV-2 viral load predicts COVID-19 mortality. *Lancet Respir Med* **8**, e70  
1377 (2020).
- 1378 49. Lee, N., *et al.* Viral loads and duration of viral shedding in adult patients hospitalized with  
1379 influenza. *J Infect Dis* **200**, 492-500 (2009).
- 1380 50. Li, C.C., *et al.* Correlation of pandemic (H1N1) 2009 viral load with disease severity and  
1381 prolonged viral shedding in children. *Emerging infectious diseases* **16**, 1265-1272 (2010).
- 1382 51. Peiris, J.S., *et al.* Clinical progression and viral load in a community outbreak of coronavirus-  
1383 associated SARS pneumonia: a prospective study. *Lancet* **361**, 1767-1772 (2003).
- 1384 52. <https://www.covid19treatmentguidelines.nih.gov/therapeutic-management/>.
- 1385 53. Kim, D., Quinn, J., Pinsky, B., Shah, N.H. & Brown, I. Rates of Co-infection Between SARS-CoV-2  
1386 and Other Respiratory Pathogens. *JAMA* **323**, 2085-2086 (2020).
- 1387 54. Kreitmann, L., Monard, C., Dauwalder, O., Simon, M. & Argaud, L. Early bacterial co-infection in  
1388 ARDS related to COVID-19. *Intensive Care Med* **46**, 1787-1789 (2020).
- 1389 55. Langford, B.J., *et al.* Bacterial co-infection and secondary infection in patients with COVID-19: a  
1390 living rapid review and meta-analysis. *Clin Microbiol Infect* **26**, 1622-1629 (2020).
- 1391 56. Sepulveda, J., *et al.* Bacteremia and Blood Culture Utilization during COVID-19 Surge in New York  
1392 City. *J Clin Microbiol* **58**(2020).
- 1393 57. Zhu, X., *et al.* Co-infection with respiratory pathogens among COVID-2019 cases. *Virus Res* **285**,  
1394 198005 (2020).
- 1395 58. Zhang, H., *et al.* Risks and features of secondary infections in severe and critical ill COVID-19  
1396 patients. *Emerg Microbes Infect* **9**, 1958-1964 (2020).
- 1397 59. Lansbury, L., Lim, B., Baskaran, V. & Lim, W.S. Co-infections in people with COVID-19: a  
1398 systematic review and meta-analysis. *J Infect* **81**, 266-275 (2020).
- 1399 60. Koehler, P., *et al.* COVID-19 associated pulmonary aspergillosis. *Mycoses* **63**, 528-534 (2020).
- 1400 61. Nolan, T.J., *et al.* Low-pathogenicity Mycoplasma spp. alter human monocyte and macrophage  
1401 function and are highly prevalent among patients with ventilator-acquired pneumonia. *Thorax*  
1402 **71**, 594-600 (2016).
- 1403 62. Tsay, J.J., *et al.* Airway Microbiota Is Associated with Upregulation of the PI3K Pathway in Lung  
1404 Cancer. *Am J Respir Crit Care Med* **198**, 1188-1198 (2018).
- 1405 63. Tsay, J.J., *et al.* Lower airway dysbiosis affects lung cancer progression. *Cancer Discov* (2020).
- 1406 64. Sulaiman, I., *et al.* Evaluation of the airway microbiome in nontuberculous mycobacteria  
1407 disease. *Eur Respir J* **52**(2018).
- 1408 65. Zhang, X., Li, L., Butcher, J., Stintzi, A. & Figeys, D. Advancing functional and translational  
1409 microbiome research using meta-omics approaches. *Microbiome* **7**, 154 (2019).
- 1410 66. Sterlin, D., *et al.* IgA dominates the early neutralizing antibody response to SARS-CoV-2. *Science*  
1411 *translational medicine* **13**(2021).
- 1412 67. Wang, Z., *et al.* Enhanced SARS-CoV-2 neutralization by dimeric IgA. *Science translational*  
1413 *medicine* **13**(2021).
- 1414 68. Klingler, J., *et al.* Role of IgM and IgA Antibodies in the Neutralization of SARS-CoV-2. *J Infect Dis*  
1415 (2020).
- 1416 69. Qiang, Z., *et al.* Nrf2 and STAT3 Alleviates Ferroptosis-Mediated IIR-ALI by Regulating SLC7A11.  
1417 *Oxid Med Cell Longev* **2020**, 5146982 (2020).
- 1418 70. Xu, Y., Li, X., Cheng, Y., Yang, M. & Wang, R. Inhibition of ACSL4 attenuates ferroptotic damage  
1419 after pulmonary ischemia-reperfusion. *FASEB J* **34**, 16262-16275 (2020).

- 1420 71. Dong, H., *et al.* Nrf2 inhibits ferroptosis and protects against acute lung injury due to intestinal  
1421 ischemia reperfusion via regulating SLC7A11 and HO-1. *Aging (Albany NY)* **12**, 12943-12959  
1422 (2020).
- 1423 72. Hallman, M., Bry, K., Hoppu, K., Lappi, M. & Pohjavuori, M. Inositol supplementation in  
1424 premature infants with respiratory distress syndrome. *N Engl J Med* **326**, 1233-1239 (1992).
- 1425 73. Preuss, S., *et al.* Inositol-trisphosphate reduces alveolar apoptosis and pulmonary edema in  
1426 neonatal lung injury. *Am J Respir Cell Mol Biol* **47**, 158-169 (2012).
- 1427 74. Sekine, T., *et al.* Robust T Cell Immunity in Convalescent Individuals with Asymptomatic or Mild  
1428 COVID-19. *Cell* **183**, 158-168 e114 (2020).
- 1429 75. Molinier-Frenkel, V., Prévost-Blondel, A. & Castellano, F. The IL411 Enzyme: A New Player in the  
1430 Immunosuppressive Tumor Microenvironment. *Cells* **8**(2019).
- 1431 76. Baas, T., *et al.* Integrated molecular signature of disease: analysis of influenza virus-infected  
1432 macaques through functional genomics and proteomics. *Journal of virology* **80**, 10813-10828  
1433 (2006).
- 1434 77. Regad, T. & Chelbi-Alix, M.K. Role and fate of PML nuclear bodies in response to interferon and  
1435 viral infections. *Oncogene* **20**, 7274-7286 (2001).
- 1436 78. Bastard, P., *et al.* Autoantibodies against type I IFNs in patients with life-threatening COVID-19.  
1437 *Science* **370**(2020).
- 1438 79. Zhang, Q., *et al.* Inborn errors of type I IFN immunity in patients with life-threatening COVID-19.  
1439 *Science* **370**(2020).
- 1440 80. Kalil, A.C., *et al.* Baricitinib plus Remdesivir for Hospitalized Adults with Covid-19. *N Engl J Med*  
1441 (2020).
- 1442 81. Zhou, Z., *et al.* Heightened Innate Immune Responses in the Respiratory Tract of COVID-19  
1443 Patients. *Cell host & microbe* **27**, 883-890 e882 (2020).
- 1444 82. Bolger, A.M., Lohse, M. & Usadel, B. Trimmomatic: a flexible trimmer for Illumina sequence  
1445 data. *Bioinformatics* **30**, 2114-2120 (2014).
- 1446 83. Kopylova, E., Noe, L. & Touzet, H. SortMeRNA: fast and accurate filtering of ribosomal RNAs in  
1447 metatranscriptomic data. *Bioinformatics* **28**, 3211-3217 (2012).
- 1448 84. Langmead, B. & Salzberg, S.L. Fast gapped-read alignment with Bowtie 2. *Nat Methods* **9**, 357-  
1449 359 (2012).
- 1450 85. Wood, D.E., Lu, J. & Langmead, B. Improved metagenomic analysis with Kraken 2. *Genome*  
1451 *biology* **20**, 257 (2019).
- 1452 86. Love, M.I., Huber, W. & Anders, S. Moderated estimation of fold change and dispersion for RNA-  
1453 seq data with DESeq2. *Genome biology* **15**, 550 (2014).
- 1454 87. Pavel, A.B., *et al.* Alterations in Bronchial Airway miRNA Expression for Lung Cancer Detection.  
1455 *Cancer Prev Res (Phila)* **10**, 651-659 (2017).
- 1456 88. Seumois, G., *et al.* Transcriptional Profiling of Th2 Cells Identifies Pathogenic Features Associated  
1457 with Asthma. *J Immunol* **197**, 655-664 (2016).
- 1458 89. Kim, J., Kim, M.S., Koh, A.Y., Xie, Y. & Zhan, X. FMAP: Functional Mapping and Analysis Pipeline  
1459 for metagenomics and metatranscriptomics studies. *BMC Bioinformatics* **17**, 420 (2016).
- 1460 90. Buchfink, B., Xie, C. & Huson, D.H. Fast and sensitive protein alignment using DIAMOND. *Nat*  
1461 *Methods* **12**, 59-60 (2015).
- 1462 91. Patro, R., Duggal, G., Love, M.I., Irizarry, R.A. & Kingsford, C. Salmon provides fast and bias-  
1463 aware quantification of transcript expression. *Nat Methods* **14**, 417-419 (2017).
- 1464 92. Mortazavi, A., Williams, B.A., McCue, K., Schaeffer, L. & Wold, B. Mapping and quantifying  
1465 mammalian transcriptomes by RNA-Seq. *Nat Methods* **5**, 621-628 (2008).
- 1466 93. Wilhelm, B.T., *et al.* Dynamic repertoire of a eukaryotic transcriptome surveyed at single-  
1467 nucleotide resolution. *Nature* **453**, 1239-1243 (2008).



- 1468 94. Sultan, M., *et al.* A global view of gene activity and alternative splicing by deep sequencing of  
1469 the human transcriptome. *Science* **321**, 956-960 (2008).
- 1470 95. Tanabe, M. & Kanehisa, M. Using the KEGG database resource. *Curr Protoc Bioinformatics*  
1471 **Chapter 1**, Unit1 12 (2012).
- 1472 96. Kanehisa, M., Goto, S., Sato, Y., Furumichi, M. & Tanabe, M. KEGG for integration and  
1473 interpretation of large-scale molecular data sets. *Nucleic Acids Res* **40**, D109-114 (2012).
- 1474 97. Law, C.W., *et al.* RNA-seq analysis is easy as 1-2-3 with limma, Glimma and edgeR. *F1000Res*  
1475 **5**(2016).
- 1476 98. Law, C.W., Chen, Y., Shi, W. & Smyth, G.K. voom: Precision weights unlock linear model analysis  
1477 tools for RNA-seq read counts. *Genome Biol* **15**, R29 (2014).
- 1478 99. Reshef, D.N., *et al.* Detecting novel associations in large data sets. *Science* **334**, 1518-1524  
1479 (2011).

1480

# Figure 1

## Culture Positivity and risk for poor outcome (n=589)

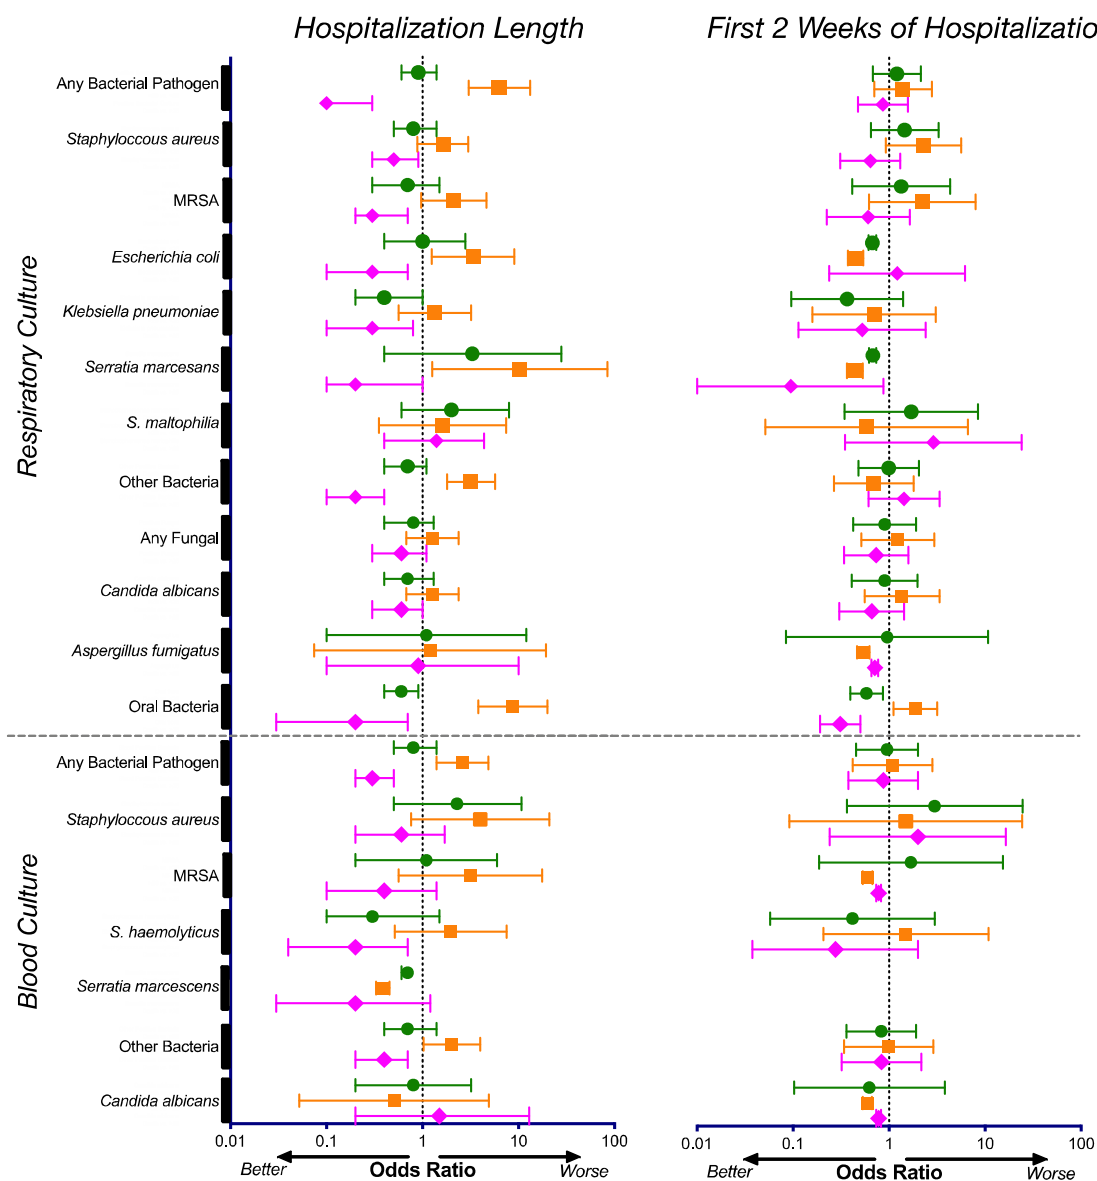

**Figure 1. Associations between culture positivity and clinical outcome.** Odds ratios and corresponding 95% confidence intervals for rates of culture positivity for the whole cohort (n=589) during the length of their hospitalization (left) and during the first 2 weeks of hospitalization (right).

**Figure 2**

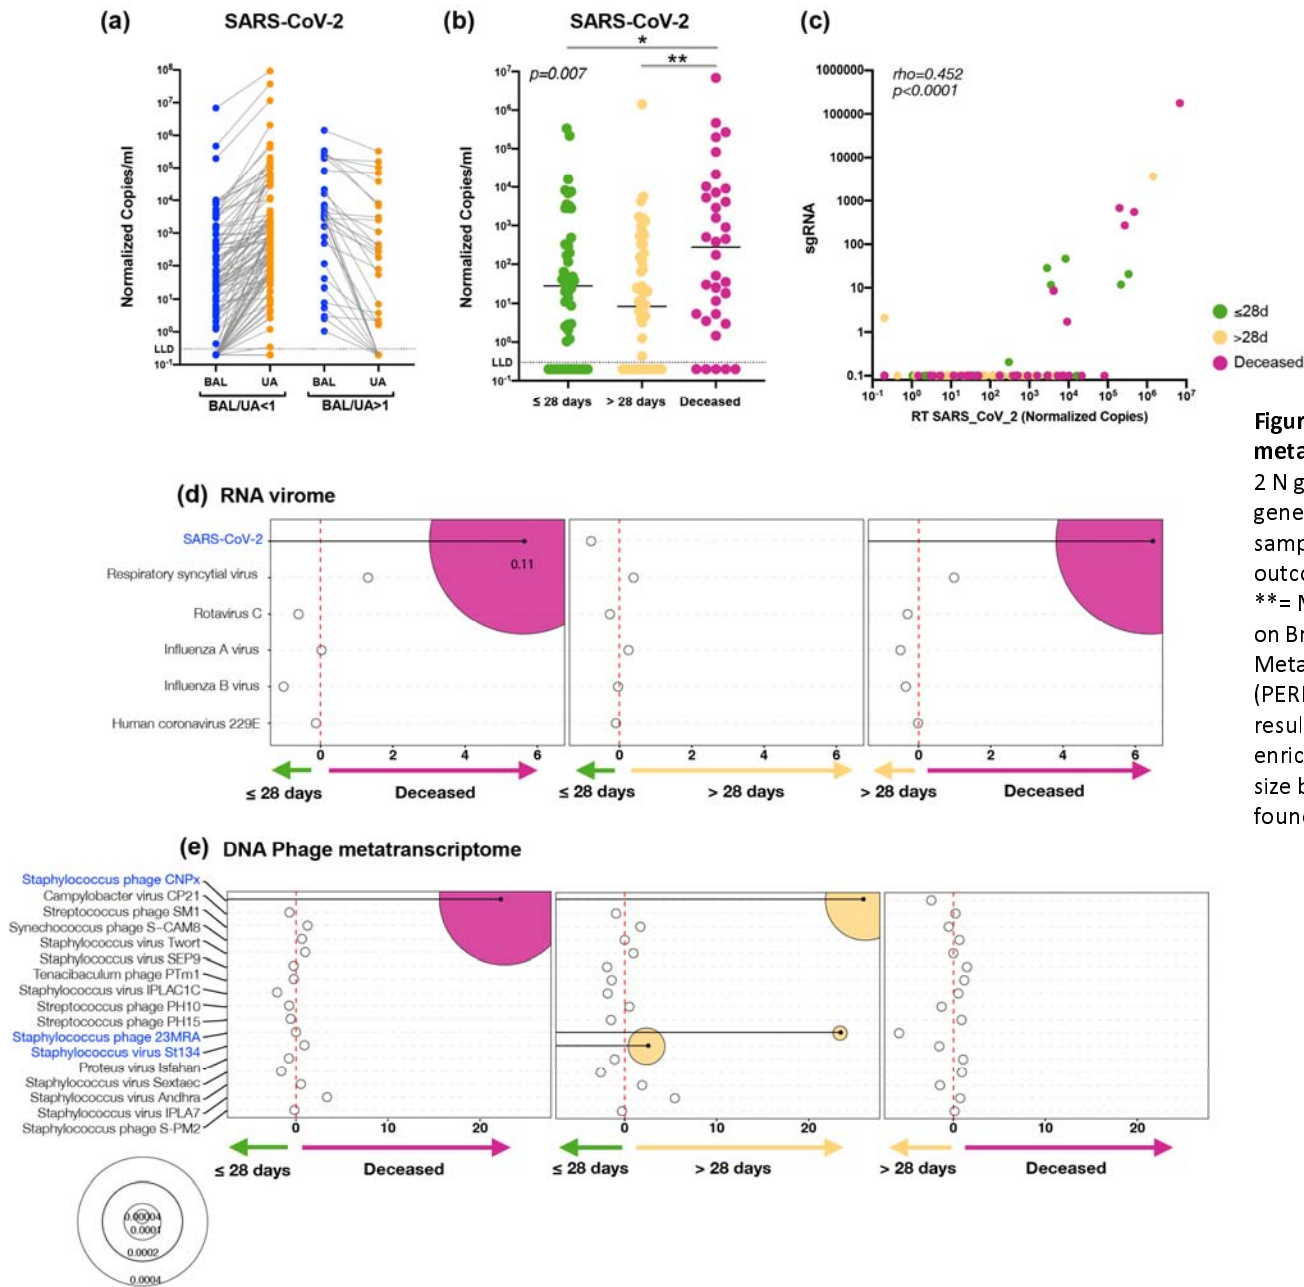

**Figure 2. SARS-CoV-2 viral load and virus metatranscriptome analyses.** Copies of the SARS-CoV-2 N gene per ml, normalized by the Human RNase P gene, comparing paired upper and lower airway samples (a) and levels in BAL comparing clinical outcome groups (b, \*= Mann-Whitney U  $p<0.05$ , \*\*= Mann-Whitney U  $p<0.01$ ). (c) PCoA analysis based on Bray Curtis Dissimilarity index of BAL Metatranscriptome data comparing clinical outcome (PERMANOVA p-value). Bubble plot showing DESeq results of RNA viruses (d) and expressed DNA phages (e) enriched in each clinical outcome comparisons (bubble size based on median relative abundance for those found statistically significant).



**Figure 4**

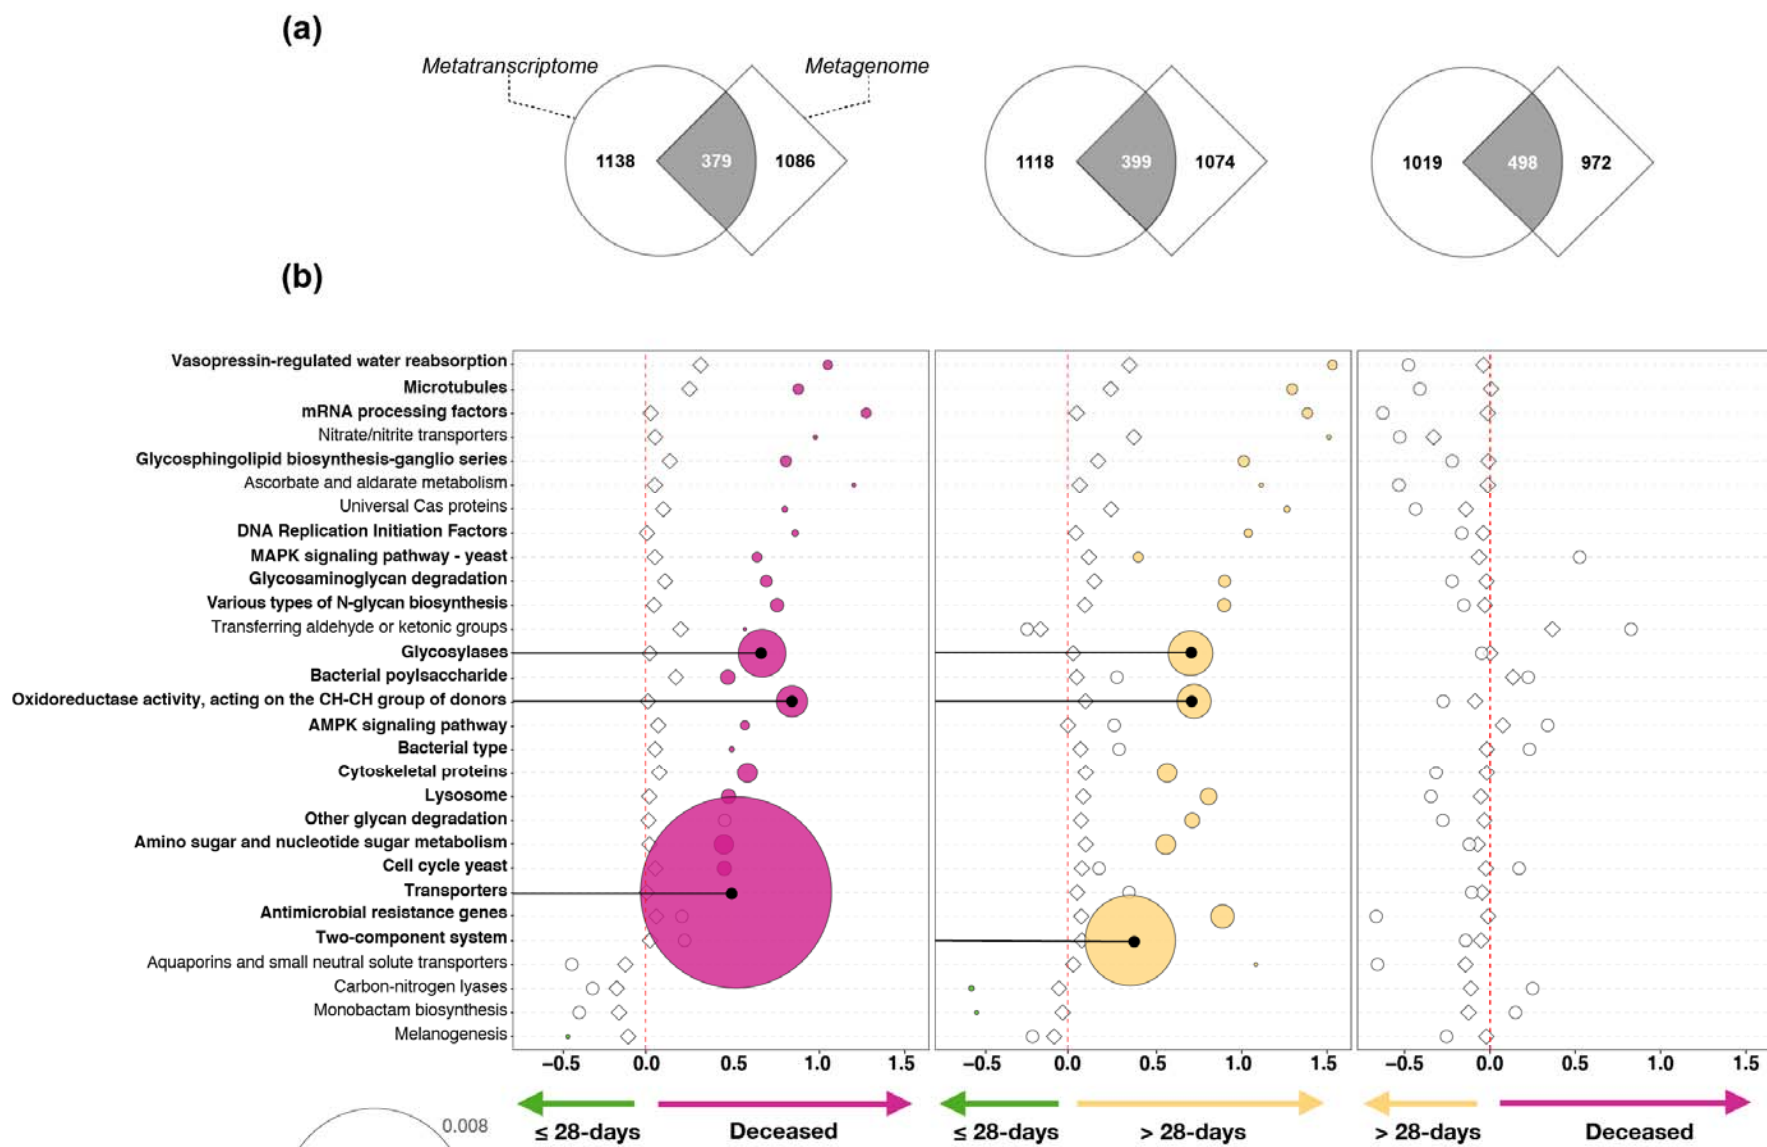

**Figure 4. Functional microbial compositional analyses.** KOs were summarized to associated pathways and differential expression was calculated based on DESeq2 analysis. (a) Gene Set Enrichment Analysis (GSEA) was used to compare the functional signatures identified in BAL metagenome and metatranscriptome as distinctly enriched for comparisons between clinical outcome groups. (b) Bubble plot showing DESeq results of microbial functions found concordantly differentially enriched between clinical outcome groups (bubble size based on median relative abundance for those found statistically significant).





Figure 6

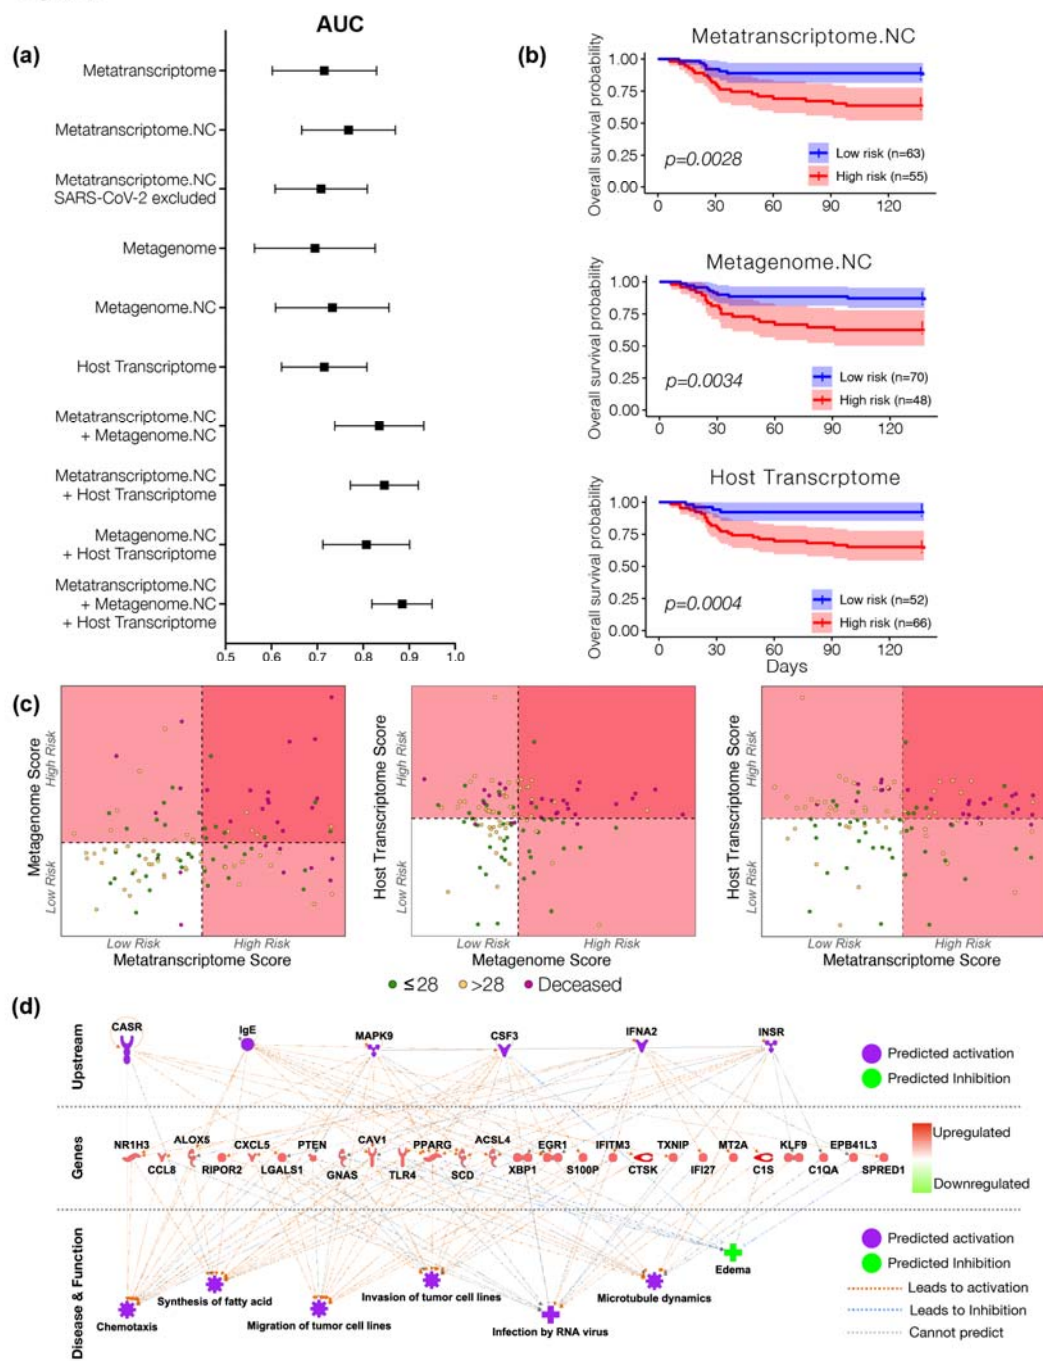

**Figure 6. Mortality predictive power of metatranscriptome, metagenome and host transcriptome.** (a) Area under the curved median and confidence interval for receiver operating characteristic curve analyses calculated from each sequencing datasets as predictor and mortality as outcome. (b) Kaplan-meier survival analyses based on a cutoff value estimated from features selected from each sequencing dataset. The “High risk” and “Low risk” groups is the mean of predicted risk scores in all samples. (c) Scatterplot among risk scores from metatranscriptome, metagenome, and host transcriptome. Dotted line denotes the mean of the risk scores across all subjects, which is also the threshold for dividing the samples into “High risk” and “Low risk” groups. (d) IPA analyses of host transcriptomic signatures identified as most predictive of mortality.
